# Supplementary material
Source: PubMed Central journal article supplement (PMC2798332)
Supplement: tpc.109.070938_1.pdf [file tpc.109.070938_1.pdf]

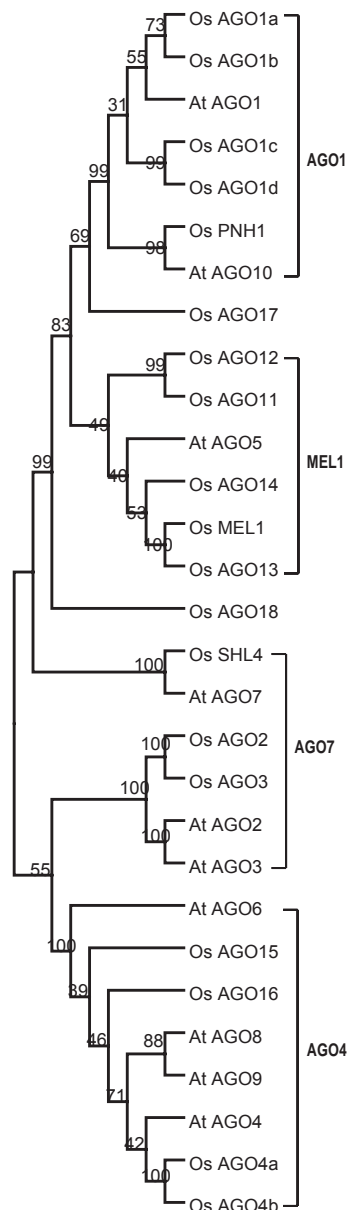

**Supplemental Figure 1. Phylogenetic relationships of Arabidopsis and rice AGO proteins.**

Alignments of full-length AGO protein sequences were produced by CLUSTALW, and used for phylogenetic analysis. The midpoint-rooted phylogenetic tree was constructed by MEGA program using Neighbor-Joining method with bootstrap values from 1000 trials. The alignment file is included in Supplemental Dataset 1.

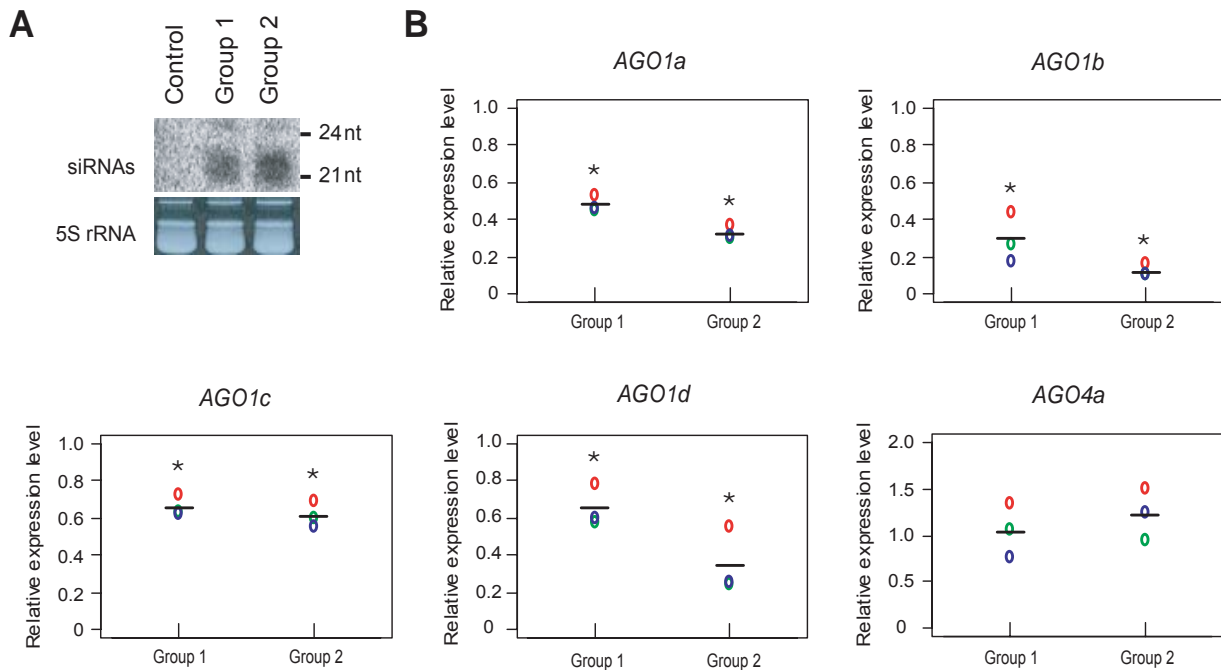

**Supplemental Figure 2. Molecular characterization of *AGO1* RNAi lines.**

**(A)** siRNAs derived from the *AGO1* IR construct were detected by RNA gel blot in both weak and strong RNAi lines, not in control rice plants. **(B)** Relative expression levels of four *AGO1*s and *AGO4a* in the leaves of the two *AGO1* RNAi lines. The gene expression levels were normalized using the signal from the *GAPDH* gene. Values (colored circles) from three technical repeats of quantitative reverse-transcription PCR are shown. Horizontal bars represent the average values. Asterisks show where differences between RNAi lines and the Control line were significant ( $P \leq 0.05$  from t test).

**AGO1a**Nominal mass (M<sub>r</sub>): 120373; Calculated pI value: 9.46

Variable modifications: Oxidation (M)

Cleavage by Trypsin: cuts C-term side of KR unless next residue is P

Sequence Coverage: **43%**Matched peptides shown in **Bold Red**

1 MAFQLDNGYY SHQALAMMRK KKTEPR**NAGE** **SSGTQQATGA** **PGR**GPSQRPE  
 51 RAQQHGGGGW QPANPQYAQQ AGRGGGQHQG RGGRYQGRGG PTSHQPGGGP  
 101 VEYQAHEEYRG RGVQRQGGMP QHR**SGSGGHG** **VPASPSRTVP** **ELHQASQDQY**  
 151 **QATVVAPSPS** **RTGPSSLPVE** ASSEEVQHQF QELAIQGGSP TSQAIQPAPP  
 201 SSKSVRFPMR PGKGTFGDRC IVK**ANHFFAE** **LPDKDLHQYD** **VSITPEVPSR**  
 251 GVNRA**AVIGEI** **VTQYRQSHLG** GRLPVYDGRK **SLYTAGPLPF** **TSRTFDVILQ**  
 301 **DEESLAVGQ** **GAQR**RERPFK VVIKFAARAD **LHHLAMFLAG** **RQADAPQEAL**  
 351 **QVL**DIVLREL PTARYSPVAR **SFYS**PNLGRR **QQLGEGLESW** RGFYQSIRPT  
 401 QMGLSLNIDM SSTAFIEPLP VIDFVAQLLN **RDISVRPLSD** **ADRVKIKKAL**  
 451 RGVK**VEVTHR** GNMRRKYRIS **GLTSQATREL** **SFPIDNHGTV** **KTVVQYFQET**  
 501 **YGFNIK**HTTL PCLQVGNQQR PNYLPMEVCK IVEGQRYSKR LNEK**QITALL**  
 551 **KVTCQR**PQER **ELDILQTVHH** **NAYHQDPYAQ** **EFGIRIDERL** **ASVEARVLPP**  
 601 **PWLK**YHDSGR **EKDVLPR**IGQ WNMNKKMVN GGRVNNWTCI NFSRHVQDNA  
 651 ARSFCRELAI MCQISGMDFS IDPVVPLVTA RPEHVERALK ARYQEAMNIL  
 701 KPQGELDLL IAILPDNNGS LYGDLKRICE TDLGLVSQCC LTKHVFKMSK  
 751 **QYLANVALKI** NVKVGGR**NTV** **LVDALTRRIP** LVSDRPTIIF GADVTHPHPG  
 801 EDSSPSIAAV VASQDWPEVT **KYAGLVSAQA** **HRQELIQDLF** **KVWKDPQRGT**  
 851 **VSGGMIRELL** **ISFKRATGQK** PQRIIFYRDG **VSEGQFYQVL** **FYELDAIRKA**  
 901 CASLEADYQP PVTFFVVQKR HHTR**LFANNH** **KDQRTVDRSG** **NILPGTVVDS**  
 951 **KICHPTEFDF** YLCSHAGIQG TSRPAHYHVL WDENKFTADG LQTLTNNLCY  
 1001 TYARCTR**SVS** **IVPPAYY AHL** **AAFRA**RYME **PDTSDSGSMA** **SGAHTRGGGP**  
 1051 **LPGARSTKPA** **GNVAVRPLPD** **LKENVKRVMF** YC

**AGO1b**Nominal mass (M<sub>r</sub>): 121557; Calculated pI value: 9.55

Variable modifications: Oxidation (M)

Cleavage by Trypsin: cuts C-term side of KR unless next residue is P

Sequence Coverage: **34%**Matched peptides shown in **Bold Red**

1 MVKKKR**TGSG** **STGESSGEAP** **GAPGHGSSQR** AERGPQQHGG GRGWVPQHGG  
 51 RGGGQYQGRG GHYQGRGGQG SHHPGGGPPE YQGRGGPGSH HPGGGPPDYQ  
 101 GRGGSGSHHP GGGPPEYQPR DYQGRGGPRP RGGMPQPYG GPRGSGGRSV  
 151 PSGSSRTVPE LHQAPHVQYQ APMVSPTPSG AGSSSQPAAE VSSGQVQQQF  
 201 QQLATR**DQSS** **TSQAIQIAPP** **SSKSVR**FPLR **PGKGT**YGDRC IVK**ANHFFAE**  
 251 **LPDKDLHQYD** **VSITPEVTSR** GVNRA**VMFEL** **VTLYR**YSHLG GRLPAYDGRK

(continued)

301 **SLYTAGPLPF ASRTFEITLQ DEEDSLGGGQ GTQRRERLFR** VVIKFAARAD  
351 **LHHLAMFLAG RQADAPQEAL QVLDIVLREL** PTTRYSPVGR **SFYSPNLGRR**  
401 **QQLGEGLESW RGFYQSIRPT** QMGLSLNIDM SSTA FIEPLP VIDFVAQLLN  
451 **RDISVRPLSD SDRVKIKKAL** RGVKVEVTHR GNMRRKYRIS **GLTSQATREL**  
501 **SFPVDDR**GTV KTVVQYFLET YGFSIQHTTL PCLQVGNQQR PNYLPMEVCK  
551 IVEGQRYSKR LNEKQITALL KVTCQRPQER ELDILR**TVSH NAYHEDQYAO**  
601 **EFGIK**IDERL ASVEARVLPP PRLKYHDSGR **EKDVLPRVGQ WNMNKKMVN**  
651 GGR**VNNWACI NFSRN**VQDSA ARGFCHELAI MCQISGMDFAL EPVLPPLTA  
701 RPEHVERALK **ARYQDAMNML RPQGRE**LDLL IVILPDNNGS LYGDLKRICE  
751 TDLGLVSQCC LTKHVFKMSK **QYLANVALKI** NVKVGGRNTV **LVDALTRRIP**  
801 LVSDRPTIIF GADVTHPHPG EDSSPSIAAV VASQDWPEVT **KYAGLVSAQA**  
851 **HRQELIQDLF KVVQDPHRGT VTGGMIKELL ISFKRATGQK** PQRIIFYRDG  
901 **VSEGQFYQVL LYELDAIRKA** CASLEPNYQP PVTFFVVQKR **HHTRLFANNH**  
951 **NDQRTVDRSG NILPGTVVDS KICHPTEFDF** YLCSHAGIQG TSRPAHYHVL  
1001 WDENKFTADE LQTLTNNLCY TYARCTRSVS IVPPAYY AHL AAFRRARFYME  
1051 PETS DSGSMA SGAATSRGLP PGVRSARVAG **NVAVRPLPAL KENVKRVMFY**  
1101 C

### AGO1c

Nominal mass ( $M_r$ ): 113073; Calculated pI value: 9.56

Variable modifications: Oxidation (M)

Cleavage by Trypsin: cuts C-term side of KR unless next residue is P

Sequence Coverage: 28%

Matched peptides shown in **Bold Red**

1 MASRRP HRH | HTEAPDPGGR GRGRGRAAR**Y AQPQPQ**QQQ **QQQQGR**GCRA  
51 **RGASPPPP**PQ **QQQQQQ**PRST PTRATTVTVA SSSSTTATAS SSPLAPELRQ  
101 AIMEAPRPSE LAQPSPTPPQ EQPVDAATTT PHHIPSSSKS IRFPLRPGKG  
151 TIGTRCMVKA NHFFAHLPNK **DLHHYDVSIT PEVTSRIVNR** AVIK**ELVNLY**  
201 **KASYLGGRLP** AYDGRKSLYT AGPLPFTSQE FQITLLDDDD GSGSERRQRT  
251 FRVVIKFAAR ADLHR**LELFL AGRHAEAPQE ALQVLDIVLR** ELPSARYAPF  
301 GR**SFFSPYLG RRQPLGEGLE** **SWR**GFYQSIR PTQMGLSLNI DMSATAFIEP  
351 LPVIDFVAQL LNSDIHSRPL SDAERVKIKK ALRGVKVEVT HRGNMRRKYR  
401 **ISGLTIQPTR ELTFPVDEGG TVKSVVQYFQ** ETYGFAIQHT YLPCLTVQRL  
451 NYLPMEVCKI VEGQRYSKRL NQNQIRALLE ETCQHPRDRE RDI IKMVK**HN**  
501 **AYQDDPYAKE** FGIKISDRLA SVEARILPAP RLKYNETGRE KDCLPR**VGQW**  
551 **NMNK**KMVNG GKVRSWMCVN FARNVQESV RGFCHALM CQASGMDFAP  
601 EPILPPLNAH PDQVERALKA **RYHDAMNVLG PQRRE**LDLLI GILPDNNGSL  
651 YGDLKRVCEI DLGIVSQCC TKQVFKMN**KQ ILANLALKIN** VKVGGRNTVL  
701 VDAVSRRIPL VTDRPTIIFG ADVTHPHPG E DSSPSIAAVV ASQDWPEVTK  
751 **YAGLVSAQAH RQELIEDLYK IWQDPQRGTV SGGMIRELLI SFKR**STGEKP  
801 QR IIFYR**DGV SEGQFYQVLL YELNAIRKAC** ASLETNYQPK **VTFIVVQKR**H  
851 HTR**LF**AHNH **DQNSVDRSGN ILPGTVVDSK** ICHPTEFDFY LCSHAGIKGT

(continued)

901 SRPAHYHVLW DENNFTADAL QILTNNLCYT YARCTRSVSI VPPAYYAHLA  
951 AFRARFYMEP DTSDSSSVVS GPGVR**GPLSG SSTSRTRAPG GAAVKLPAL**  
1001 **K**DSVKRVMFY C

**Supplemental Figure 3. Sequencing of purified rice AGO1a, AGO1b, and AGO1c by mass spectrometry.**

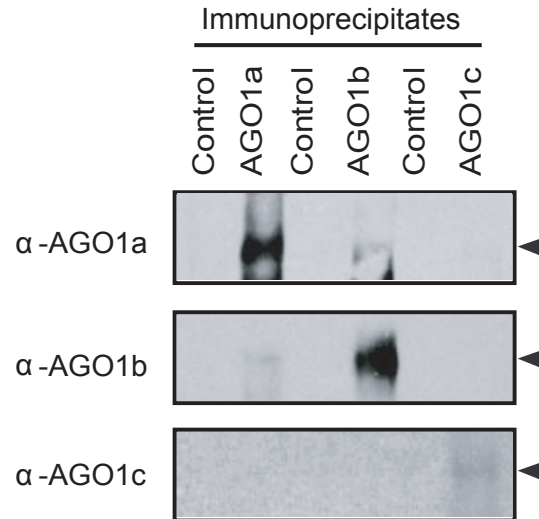

**Supplemental Figure 4. Immunoblot analysis with AGO1 immunoprecipitates.**

AGO1a, AGO1b, and AGO1c were immunopurified from rice seedling extracts. Pre-immune sera were used for control immunoprecipitation (Control). Immunoprecipitates were separated on 10% SDS-PAGE, transferred to Hybond-ECL membranes, and subjected to immunoblotting using indicated antibodies. Positions of the AGO1 proteins are indicated by the arrows.



Supplemental Figure 6, Wu et al.

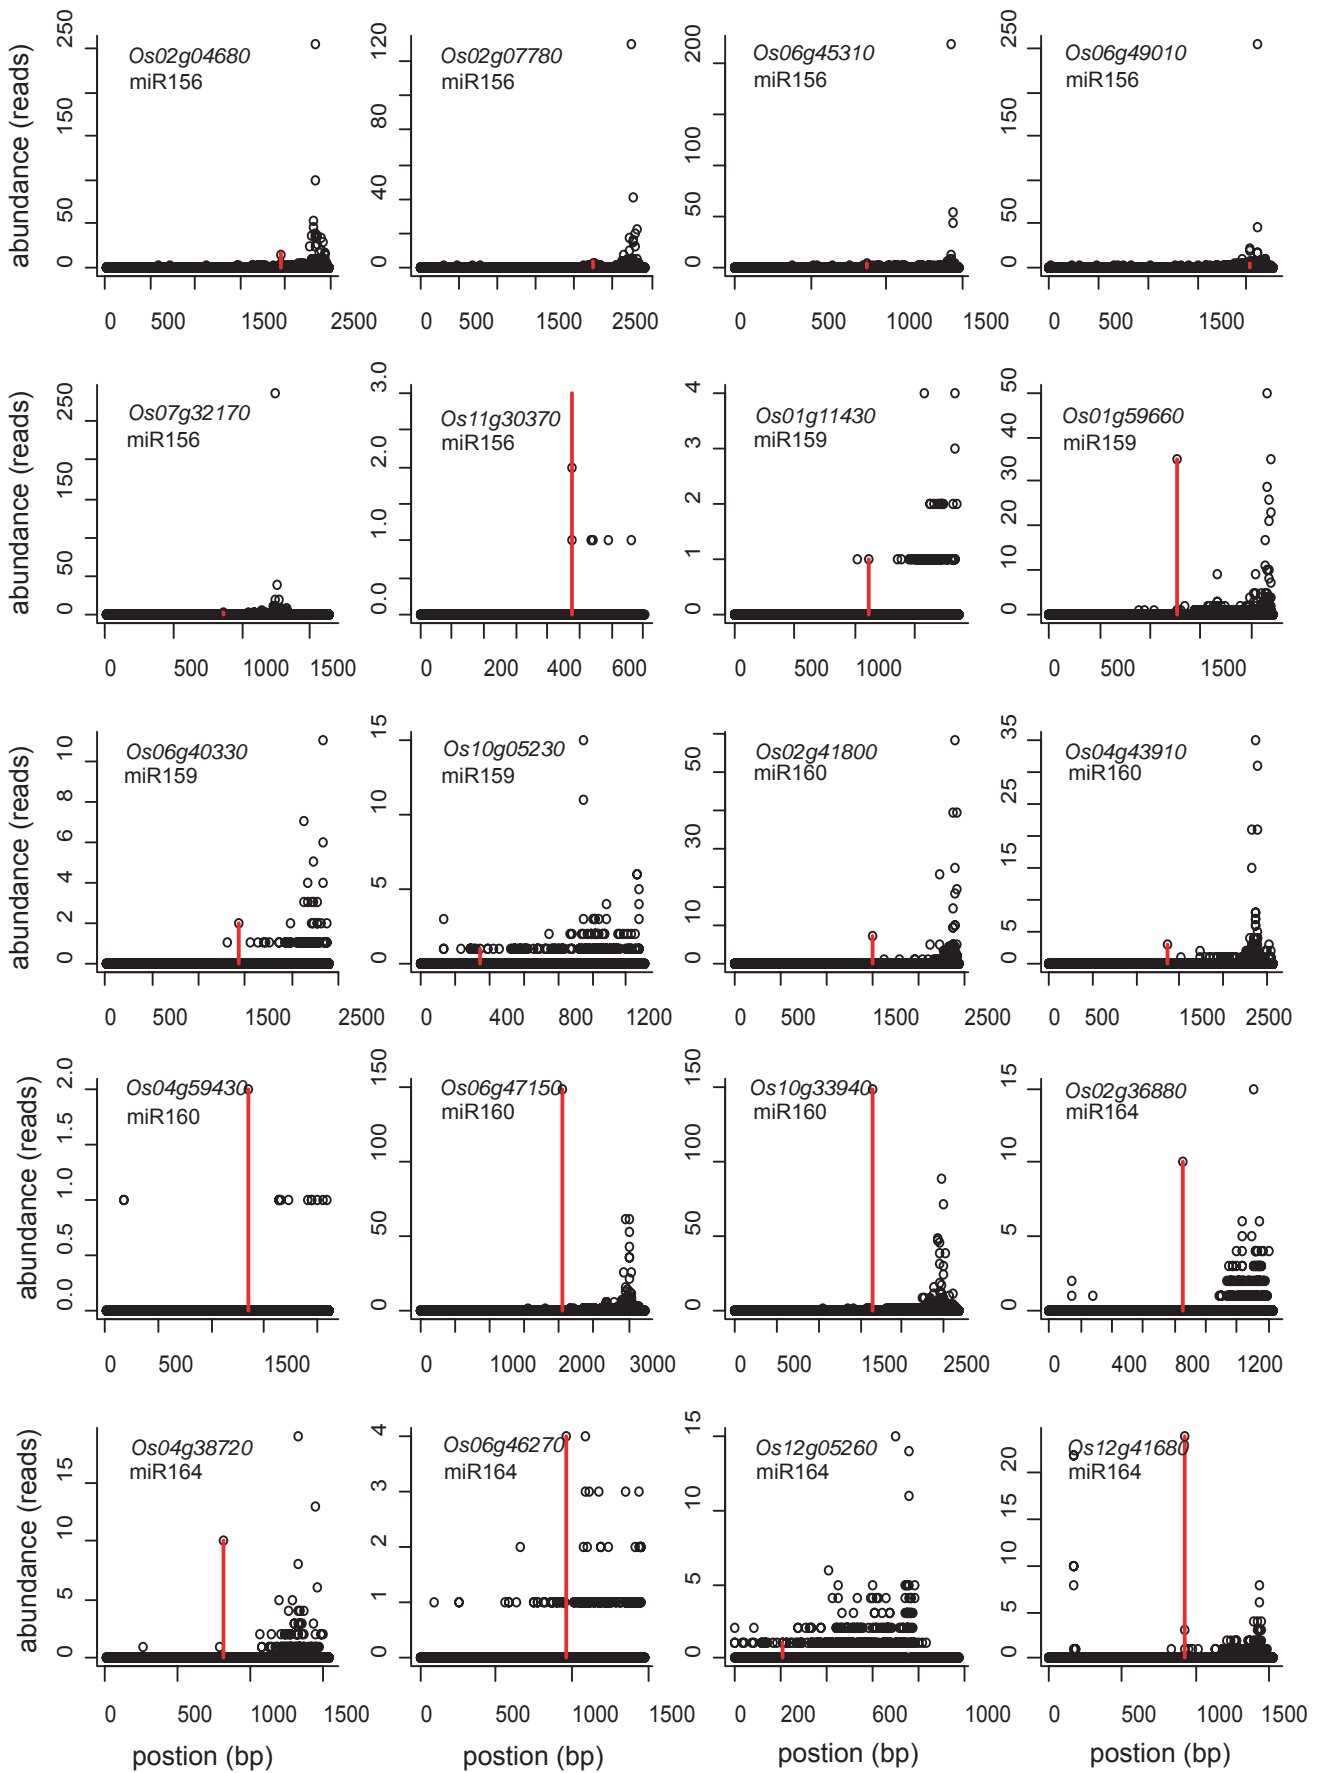



(continued)

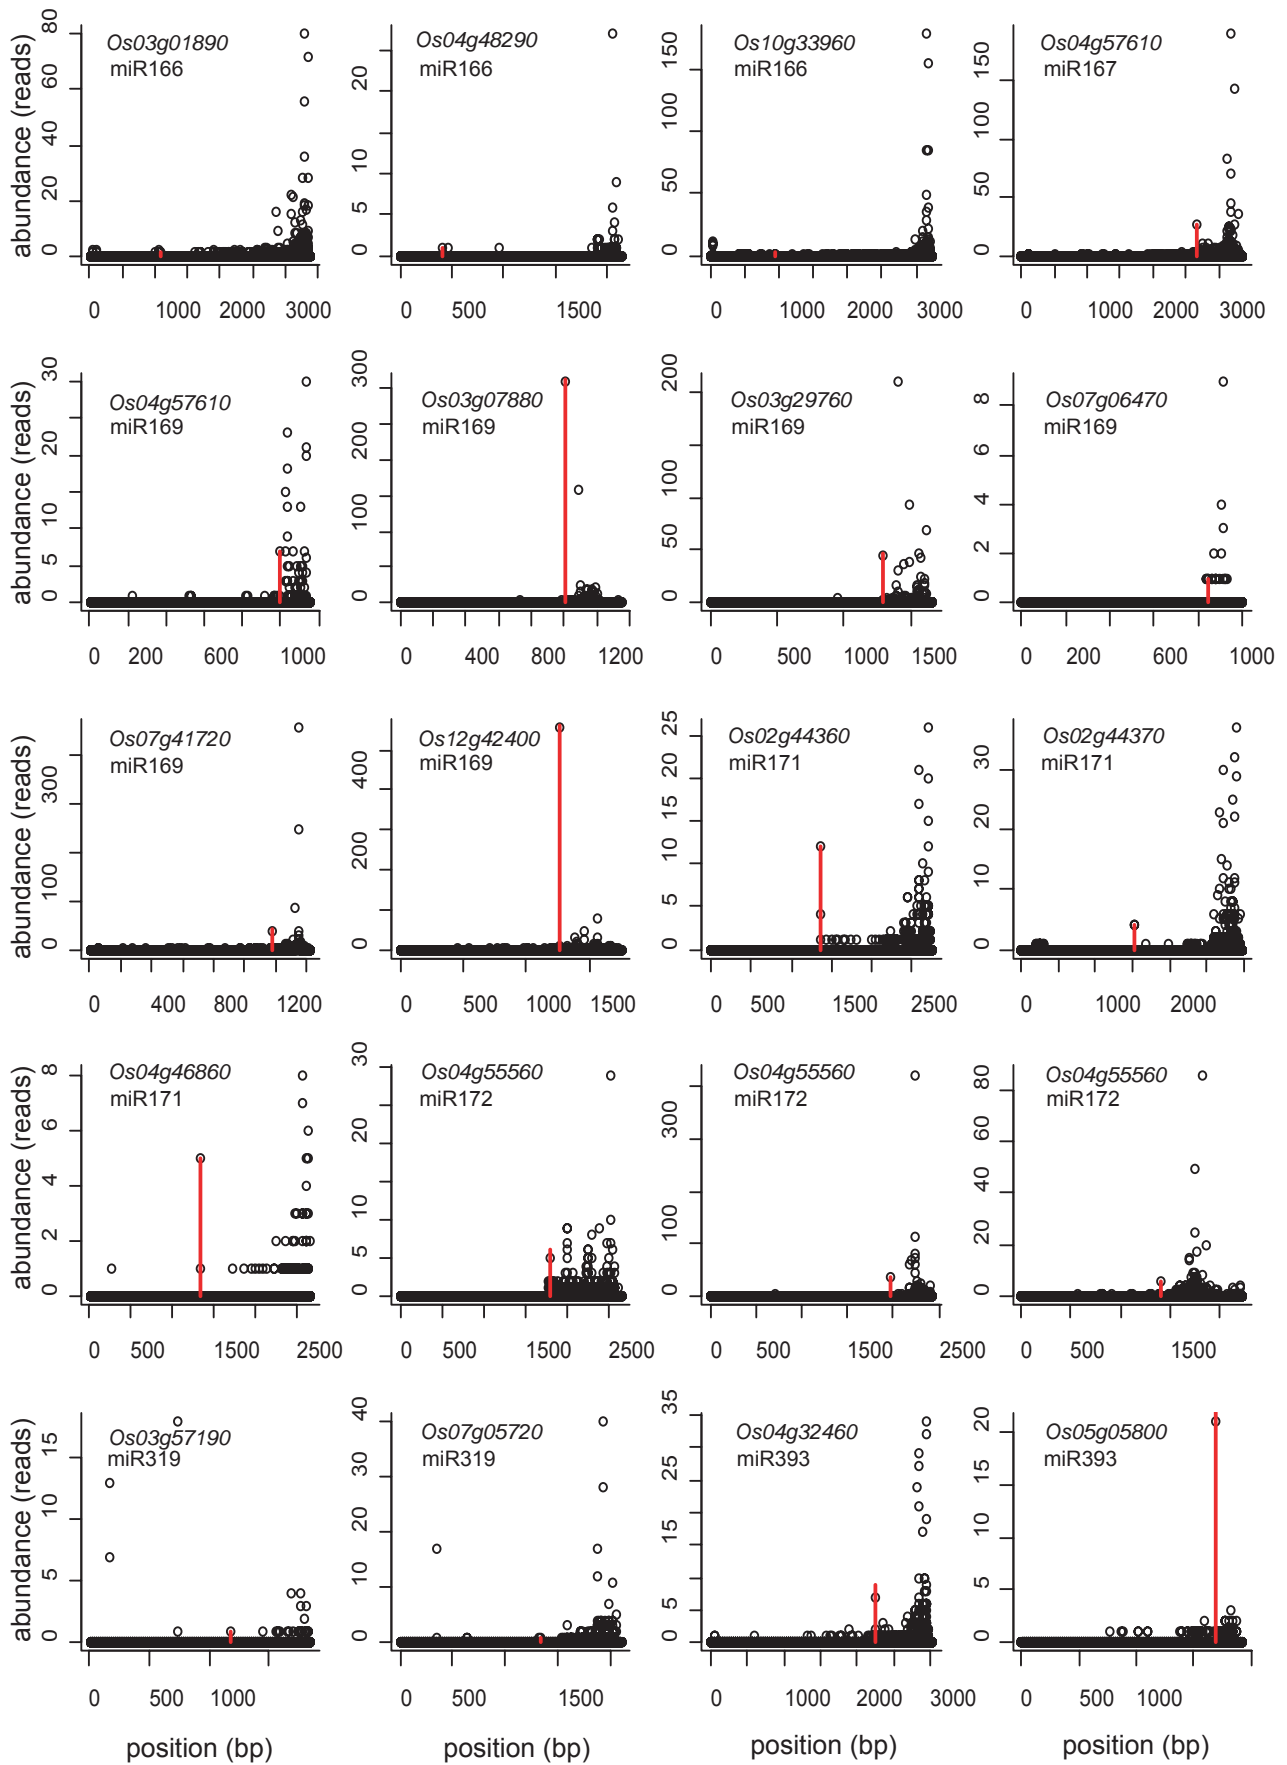

(continued)

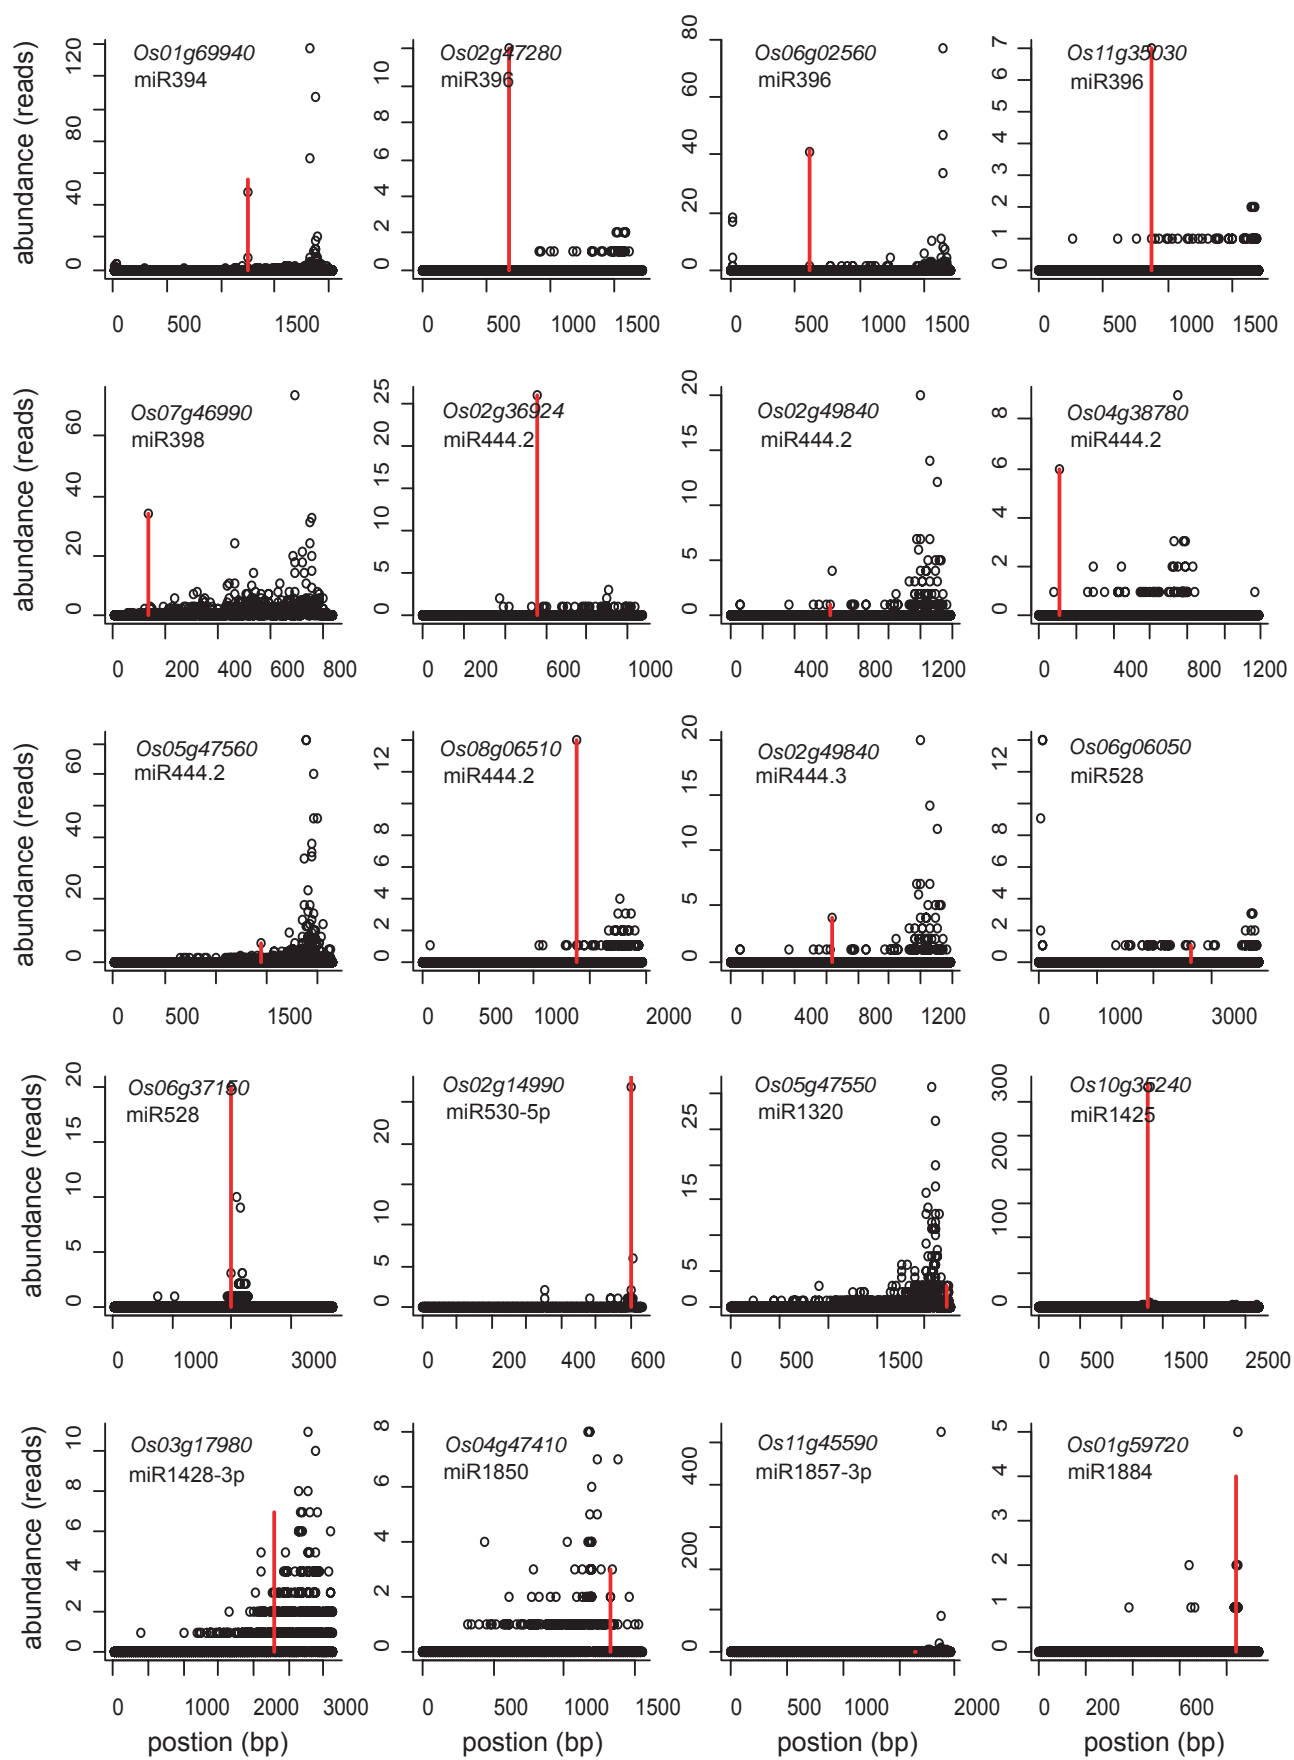

(continued)

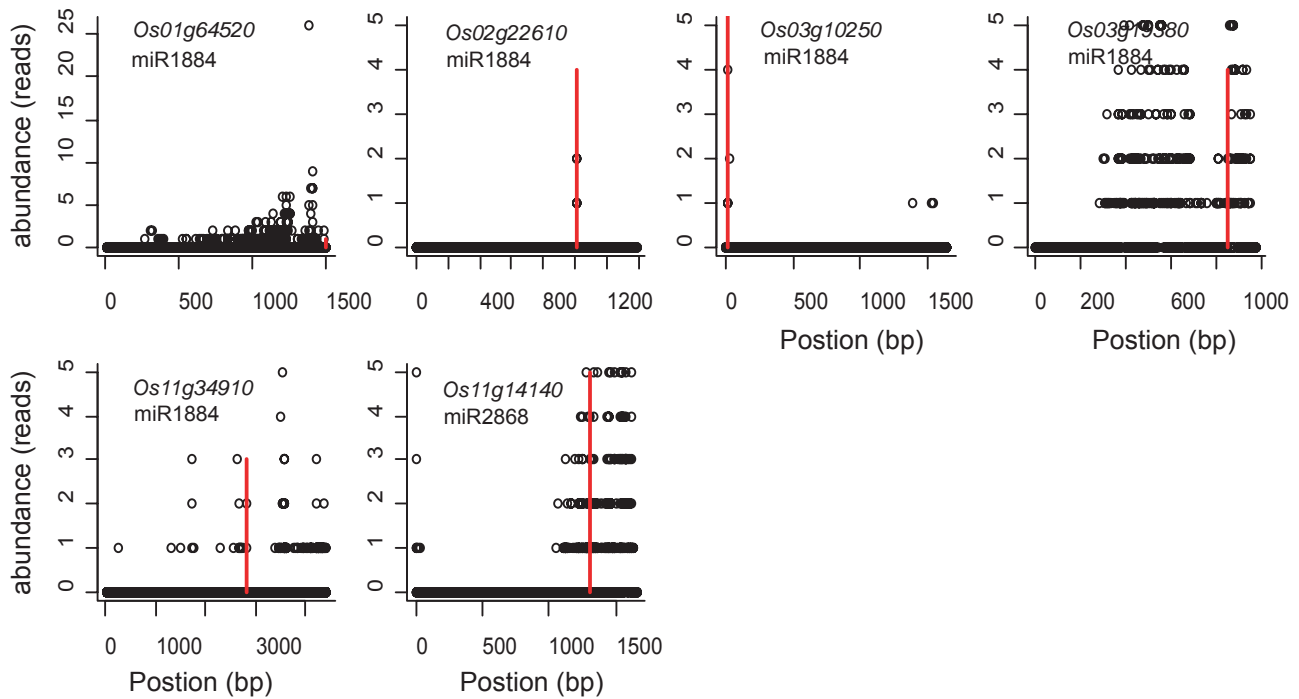

### Supplemental Figure 6. Target plots of validated rice miRNA targets.

The abundance of each signature from degradome sequencing is plotted as a function of its position in the transcript. The signatures matching  $\pm 1$  positions of the expected miRNA cleavage site are combined and shown in red.

**Supplemental Table 1. Summary of sequenced small RNAs in rice total extract and AGO1 complexes**

| Category                           | Total Extract                  |                 | AGO1a            |               | AGO1b                    |                               | AGO1c         |              |
|------------------------------------|--------------------------------|-----------------|------------------|---------------|--------------------------|-------------------------------|---------------|--------------|
|                                    | Unique                         | Reads           | Unique           | Reads         | Unique                   | Reads                         | Unique        | Reads        |
| <b>miRNAs</b>                      | 9798(0.492%) 364108(9.036% )   | 698(3.090%)     | 3449107(90.981%) | 264 ( 5.376%) | 978003 ( 79.469%)        | 624(3.894%) 3383266(86.93 6%) |               |              |
| <b>miRNA<sup>a</sup></b>           | 944(0.047%) 280338(6.957% )    | 273(1.209%)     | 3419816(90.209%) | 163 ( 3.319%) | 968846 ( 78.725%)        | 279(1.741%) 3344958(85.95 1%) |               |              |
| <b>miRNA<sup>*a</sup></b>          | 783(0.039%) 21708(0.539% )     | 54(0.239%)      | 7113(0.188%)     | 21 ( 0.428%)  | 2596 ( 0.211%)           | 47(0.293%) 7886(0.203% )      |               |              |
| <b>Other<sup>b</sup></b>           | 8458(0.425%) 74055(1.838% )    | 411(1.820%)     | 35102(0.926%)    | 98 ( 1.996%)  | 14697 ( 1.194%)          | 330(2.059%) 44170(1.135% )    |               |              |
| <b>Ta-siRNAs</b>                   | 494(0.025%) 3785(0.094% )      | 82(0.363%)      | 10759(0.284%)    | 29 ( 0.591%)  | 2386 ( 0.194%)           | 66(0.412%) 5721(0.147% )      |               |              |
| <b>TAS3a1</b>                      | 117(0.006%) 603(0.015% )       | 16(0.071%)      | 566(0.015%)      | 4 ( 0.081%)   | 215 ( 0.017%)            | 13(0.081%) 1173(0.030% )      |               |              |
| <b>TAS3a2</b>                      | 98(0.005%) 594(0.015% )        | 7(0.031%)       | 186(0.005%)      | 3 ( 0.061%)   | 3 ( 0.0001%)             | 7(0.044%) 198(0.005% )        |               |              |
| <b>TAS3b1</b>                      | 239(0.012%) 2480(0.062% )      | 53(0.235%)      | 9896(0.261%)     | 21 ( 0.428%)  | 2005(0.163%) 41(0.256% ) | 4187(0.108%)                  |               |              |
| <b>TAS3b2</b>                      | 46(0.002%) 187(0.005% )        | 7(0.031%)       | 124(0.003%)      | 1 ( 0.020%)   | 163(0.013%) 5(0.031% )   | 163(0.004%)                   |               |              |
| <b>Nat-siRNAs<sup>c</sup></b>      | 19378(0.97%)                   | 73980(1.84%)    | 499 (2%)         | 68566 (2%)    | 155 (3%)                 | 18562 (2%)                    | 367 (2%)      | 23413 (0.6%) |
| <b>Ra-siRNAs<sup>d</sup></b>       | 1325425(66.54%)                | 2662041(66.06%) | 16845 (75%)      | 538179 (14%)  | 3473 (71%)               | 243675 (20%)                  | 12120 (76%)   | 602906 (15%) |
| <b>Dispersed repeat</b>            | 1250628(62.78%)                | 2369705(58.81%) | 14990 (66%)      | 195662 (5%)   | 3040 (62%)               | 115772 (9%)                   | 10643 (66%)   | 273782 (7%)  |
| <b>Tandem repeat</b>               | 115735(5.81%)                  | 263508(6.54%)   | 2306 (10%)       | 36817 (1%)    | 465 (9%)                 | 11381 (1%)                    | 1648 (10%)    | 54661 (1%)   |
| <b>Inverted repeat</b>             | 512499(25.73%)                 | 1184107(29.39%) | 10069 (45%)      | 463929 (12%)  | 1971 (40%)               | 163000 (13%)                  | 7525 (47%)    | 501307 (13%) |
| <b>Non-coding RNAs<sup>e</sup></b> | 9225(0.46%)                    | 152138(3.78%)   | 146 (0.6%)       | 9195 (0.2%)   | 101 (2%)                 | 54426 (4%)                    | 136 (0.8%)    | 18458 (0.5%) |
| <b>rRNA</b>                        | 1098(0.055%)                   | 9913(0.25%)     | 13 (0.06%)       | 174 (0.005%)  | 13 (0.3%)                | 914 (0.07%)                   | 12 (0.07%)    | 420 (0.01%)  |
| <b>tRNA</b>                        | 2112(0.106%)                   | 137952(3.42%)   | 56 (0.2%)        | 7784 (0.2%)   | 51 (1%)                  | 50574 (4%)                    | 52 (0.3%)     | 15401 (0.4%) |
| <b>snoRNA</b>                      | 1017(0.051%)                   | 1882(0.047%)    | 68 (0.3%)        | 1115 (0.03%)  | 33 (0.7%)                | 2852 (0.2%)                   | 63 (0.4%)     | 2392 (0.06%) |
| <b>snRNA</b>                       | 842(0.042%)                    | 1342(0.033%)    | 9 (0.04%)        | 122 (0.003%)  | 3 (0.06%)                | 85 (0.007%)                   | 5 (0.03%)     | 80 (0.002%)  |
| <b>Protein-coding genes</b>        | 218638(10.98%) 543423(13.49% ) | 3206 (14.19%)   | 82897(2.19%)     | 857(17.45%)   | 88748(7.2%)              | 2391(14.92%)                  | 138233(3.55%) |              |
| <b>Others<sup>f</sup></b>          | 150666(7.56%)                  | 261939(6.50%)   | 3969 (18%)       | 61303 (2%)    | 876 (18%)                | 46935 (4%)                    | 2579 (16%)    | 90260 (2%)   |
| <b>Chloroplast</b>                 | 39410(1.98%)                   | 278808(6.92%)   | 508 (2%)         | 12753 (0.3%)  | 351 (7%)                 | 69861 (6%)                    | 462 (3%)      | 19505 (0.5%) |
| <b>Mitochondrial</b>               | 9171(0.46%)                    | 37931(0.94%)    | 114 (0.5%)       | 1655 (0.04%)  | 60 (1%)                  | 4486 (0.4%)                   | 142 (0.9%)    | 3665 (0.09%) |
| <b>Total<sup>g</sup></b>           | 1991942 4029462 2              |                 | 2588             | 3791013       | 4911                     | 1230668                       | 16024         | 3891687      |

<sup>a</sup>Reads encompass the defined miRNA/miRNA\* sequence $\pm$ 2 nts on each side.

<sup>b</sup>Other small RNAs that are produced from miRNA precursors.

<sup>c</sup>Antisense transcripts were annotated as described (Osato et al., *Genome Biology* 2003, 5: R5)

<sup>d</sup>Dispersed repeats were annotated by RepeatMasker, Tandem repeats were annotated by tandem repeat finder program, and Inverted repeat were annotated by inverted repeat finder program

<sup>e</sup>rfam annotated ncRNAs.

<sup>f</sup>sRNA mapped to the TIGR annotated intergenic regions that do not encode miRNAs, ta-siRNAs, Nat-siRNAs, ra-siRNAs and ncRNAs.

<sup>g</sup>Some small RNAs can match more than one category of the sequences listed so the sum of the numbers is bigger than the input total number.

**Supplemental Table 2.** Distribution of miRNAs in Rice AGO1 Complexes

| miRNA family    | miRNA reads <sup>a</sup> |        |        |        | Fold enrichment (log <sub>2</sub> scale) <sup>b</sup> |       |       |
|-----------------|--------------------------|--------|--------|--------|-------------------------------------------------------|-------|-------|
|                 | Total                    | AGO1a  | AGO1b  | AGO1c  | AGO1a                                                 | AGO1b | AGO1c |
| osa-mir156      | 1779                     | 14735  | 9056   | 1208   | 3.05                                                  | 2.35  | -0.56 |
| osa-mir159      | 10704                    | 357262 | 221326 | 466378 | 5.06                                                  | 4.37  | 5.45  |
| osa-mir160      | 71                       | 183    | 77     | 238    | 1.37                                                  | 0.12  | 1.75  |
| osa-mir162      | 983                      | 4167   | 4759   | 3619   | 2.08                                                  | 2.28  | 1.88  |
| osa-mir164      | 478                      | 63     | 167    | 352    | -2.92                                                 | -1.52 | -0.44 |
| osa-mir166      | 2314                     | 16778  | 16538  | 31230  | 2.86                                                  | 2.84  | 3.75  |
| osa-mir167      | 15595                    | 9282   | 3263   | 24053  | -0.75                                                 | -2.26 | 0.63  |
| osa-mir168      | 7690                     | 8314   | 7041   | 705    | 0.11                                                  | -0.13 | -3.45 |
| osa-mir169      | 207                      | 537    | 574    | 289    | 1.38                                                  | 1.47  | 0.48  |
| osa-mir171      | 508                      | 328    | 2255   | 2154   | -0.63                                                 | 2.15  | 2.08  |
| osa-mir172      | 176                      | 9      | 0      | 38     | -4.15                                                 | -7.47 | -2.18 |
| osa-mir319      | 24                       | 10     | 100    | 0      | -1.18                                                 | 2.01  | -4.64 |
| osa-mir390      | 10                       | 0      | 0      | 0      | -3.46                                                 | -3.46 | -3.46 |
| osa-mir393      | 815                      | 26     | 189    | 62     | -4.97                                                 | -2.11 | -3.72 |
| osa-mir393b.3p  | 2115                     | 162    | 1448   | 1462   | -3.70                                                 | -0.55 | -0.53 |
| osa-mir394      | 31                       | 23     | 361    | 167    | -0.43                                                 | 3.54  | 2.43  |
| osa-mir395      | 55                       | 150    | 161    | 157    | 1.45                                                  | 1.55  | 1.51  |
| osa-mir395a.2   | 8                        | 3      | 1      | 38     | -1.15                                                 | -2.34 | 2.10  |
| osa-mir396      | 22379                    | 483132 | 510450 | 319560 | 4.43                                                  | 4.51  | 3.84  |
| osa-mir397      | 130                      | 761    | 1127   | 1248   | 2.55                                                  | 3.12  | 3.26  |
| osa-mir397a.2   | 266                      | 296    | 3016   | 3192   | 0.15                                                  | 3.50  | 3.58  |
| osa-mir397b.2   | 1116                     | 360    | 3798   | 3483   | -1.63                                                 | 1.77  | 1.64  |
| osa-mir398      | 17                       | 219    | 249    | 229    | 3.69                                                  | 3.87  | 3.75  |
| osa-mir399      | 8                        | 33     | 171    | 52     | 2.04                                                  | 4.42  | 2.70  |
| osa-mir408      | 13                       | 2305   | 2014   | 2279   | 7.47                                                  | 7.28  | 7.45  |
| osa-mir435      | 31                       | 47     | 2      | 92     | 0.60                                                  | -3.95 | 1.57  |
| osa-mir437      | 2                        | 0      | 1      | 0      | -1.58                                                 | -0.58 | -1.58 |
| osa-mir437-3p.2 | 71                       | 0      | 1      | 0      | -6.17                                                 | -5.31 | -6.17 |
| osa-mir437-3p.3 | 141                      | 0      | 0      | 0      | -7.15                                                 | -7.15 | -7.15 |
| osa-mir437-5p   | 62                       | 1      | 1      | 5      | -5.29                                                 | -5.12 | -3.49 |
| osa-mir438      | 0                        | 0      | 0      | 0      | 0.00                                                  | 0.00  | 0.00  |
| osa-mir440      | 6                        | 0      | 0      | 0      | -2.81                                                 | -2.81 | -2.81 |
| osa-mir444a.1   | 2                        | 4      | 0      | 0      | 0.74                                                  | -1.58 | -1.58 |
| osa-mir444a.2   | 23                       | 39     | 80     | 53     | 0.76                                                  | 1.80  | 1.20  |
| osa-mir444b.1   | 900                      | 1827   | 3547   | 1909   | 1.02                                                  | 1.98  | 1.08  |
| osa-mir444b.2   | 388                      | 797    | 1949   | 799    | 1.04                                                  | 2.33  | 1.04  |
| osa-mir444c.1   | 900                      | 1827   | 3547   | 1909   | 1.02                                                  | 1.98  | 1.08  |
| osa-mir444c.2   | 388                      | 797    | 1949   | 799    | 1.04                                                  | 2.33  | 1.04  |
| osa-mir444d.1   | 2                        | 4      | 0      | 0      | 0.74                                                  | -1.58 | -1.58 |
| osa-mir444d.2   | 22                       | 39     | 80     | 53     | 0.83                                                  | 1.86  | 1.27  |
| osa-mir444d.3   | 34                       | 20     | 0      | 74     | -0.74                                                 | -5.13 | 1.10  |

|                  |     |     |     |      |       |       |       |
|------------------|-----|-----|-----|------|-------|-------|-------|
| osa-mir444       | 29  | 47  | 83  | 58   | 0.70  | 1.52  | 1.00  |
| osa-mir528       | 31  | 93  | 1   | 1457 | 1.58  | -4.95 | 5.55  |
| osa-mir529       | 9   | 0   | 0   | 0    | -3.32 | -3.32 | -3.32 |
| osa-mir530-3p    | 4   | 0   | 0   | 0    | -2.32 | -2.32 | -2.32 |
| osa-mir530-5p    | 2   | 0   | 0   | 20   | -1.58 | -1.58 | 2.81  |
| osa-mir531       | 4   | 0   | 0   | 0    | -2.32 | -2.32 | -2.32 |
| osa-mir535       | 149 | 448 | 651 | 184  | 1.59  | 2.13  | 0.30  |
| osa-mir820       | 89  | 42  | 172 | 8    | -1.08 | 0.95  | -3.48 |
| osa-miR820-5p.1  | 59  | 5   | 0   | 0    | -3.26 | -5.91 | -5.91 |
| osa-miR820-5p.2  | 51  | 0   | 0   | 0    | -5.70 | -5.70 | -5.70 |
| osa-mir827       | 0   | 0   | 0   | 0    | 0.00  | 0.00  | 0.00  |
| osa-mir1317      | 17  | 0   | 0   | 0    | -4.17 | -4.17 | -4.17 |
| osa-mir1317.3p   | 193 | 0   | 0   | 0    | -7.60 | -7.60 | -7.60 |
| osa-mir1317.5p.2 | 172 | 4   | 89  | 11   | -5.09 | -0.94 | -3.88 |
| osa-mir1318      | 169 | 9   | 0   | 3    | -4.09 | -7.41 | -5.41 |
| osa-mir1320      | 3   | 0   | 0   | 0    | -2.00 | -2.00 | -2.00 |
| osa-mir1320.3p   | 24  | 1   | 2   | 0    | -3.42 | -3.23 | -4.62 |
| osa-mir1423      | 13  | 4   | 0   | 5    | -1.49 | -3.81 | -1.22 |
| osa-miR1423-5p.1 | 1   | 0   | 0   | 0    | -1    | -1    | -1    |
| osa-miR1423-5p.2 | 19  | 0   | 0   | 0    | -4    | -4    | -4    |
| osa-miR1423-3p.2 | 12  | 0   | 0   | 0    | -4    | -4    | -4    |
| osa-mir1424      | 0   | 0   | 0   | 0    | 0.00  | 0.00  | 0.00  |
| osa-mir1425      | 277 | 286 | 310 | 336  | 0.05  | 0.16  | 0.28  |
| osa-mir1426      | 0   | 0   | 0   | 0    | 0.00  | 0.00  | 0.00  |
| osa-mir1427      | 18  | 0   | 0   | 0    | -4.25 | -4.25 | -4.25 |
| osa-mir1428a-3p  | 0   | 0   | 0   | 0    | 0.00  | 0.00  | 0.00  |
| osa-mir1428a-5p  | 0   | 0   | 0   | 0    | 0.00  | 0.00  | 0.00  |
| osa-mir1428e-3p  | 18  | 0   | 0   | 0    | -4.25 | -4.25 | -4.25 |
| osa-mir1428e-5p  | 3   | 0   | 0   | 0    | -2.00 | -2.00 | -2.00 |
| osa-mir1428      | 0   | 0   | 0   | 0    | 0.00  | 0.00  | 0.00  |
| osa-mir1429      | 3   | 11  | 174 | 5    | 1.87  | 5.86  | 0.74  |
| osa-mir1429-5p.2 | 82  | 0   | 0   | 0    | -6.38 | -6.38 | -6.38 |
| osa-mir1429-3p.2 | 55  | 0   | 0   | 0    | -6    | -6    | -6    |
| osa-mir1430      | 8   | 0   | 0   | 0    | -3.17 | -3.17 | -3.17 |
| osa-mir1431      | 5   | 1   | 0   | 0    | -1.58 | -2.58 | -2.58 |
| osa-mir1432      | 169 | 9   | 0   | 3    | -4.09 | -7.41 | -5.41 |
| osa-mir1433      | 0   | 0   | 0   | 5    | 0.00  | 0.00  | 2.58  |
| osa-mir1435      | 0   | 0   | 0   | 0    | 0.00  | 0.00  | 0.00  |
| osa-mir1846a-3p  | 0   | 0   | 46  | 6    | 0.00  | 5.55  | 2.81  |
| osa-mir1846a-5p  | 0   | 0   | 0   | 0    | 0.00  | 0.00  | 0.00  |
| osa-mir1846b-3p  | 0   | 0   | 46  | 6    | 0.00  | 5.55  | 2.81  |
| osa-mir1846b-5p  | 0   | 0   | 0   | 0    | 0.00  | 0.00  | 0.00  |
| osa-mir1846c-3p  | 0   | 0   | 0   | 0    | 0.00  | 0.00  | 0.00  |
| osa-mir1846c-5p  | 0   | 0   | 0   | 0    | 0.00  | 0.00  | 0.00  |
| osa-mir1846d-3p  | 1   | 0   | 0   | 0    | -1.00 | -1.00 | -1.00 |

|                  |      |     |    |     |        |       |       |
|------------------|------|-----|----|-----|--------|-------|-------|
| osa-mir1846d-5p  | 4    | 15  | 0  | 3   | 1.68   | -2.32 | -0.32 |
| osa-mir1848      | 0    | 0   | 0  | 0   | 0.00   | 0.00  | 0.00  |
| osa-mir1849      | 1    | 13  | 1  | 7   | 3.70   | 0.00  | 2.81  |
| osa-mir1849.2    | 35   | 0   | 1  | 0   | -5.16  | -4.30 | -4.83 |
| osa-mir1850      | 23   | 0   | 0  | 5   | -4.58  | -4.58 | -2.00 |
| osa-mir1850.2    | 42   | 0   | 0  | 0   | -5.43  | -5.43 | -5.43 |
| osa-mir1851      | 1    | 0   | 0  | 0   | -1.00  | -1.00 | -1.00 |
| osa-mir1852      | 0    | 0   | 0  | 0   | 0.00   | 0.00  | 0.00  |
| osa-mir1853-3p   | 0    | 0   | 0  | 0   | 0.00   | 0.00  | 0.00  |
| osa-mir1853-5p   | 0    | 0   | 0  | 0   | 0.00   | 0.00  | 0.00  |
| osa-mir1854-3p   | 0    | 0   | 0  | 0   | 0.00   | 0.00  | 0.00  |
| osa-mir1854-5p   | 0    | 0   | 0  | 0   | 0.00   | 0.00  | 0.00  |
| osa-mir1855      | 0    | 0   | 0  | 0   | 0.00   | 0.00  | 0.00  |
| osa-mir1856      | 50   | 119 | 2  | 100 | 1.25   | -4.64 | 1.00  |
| osa-mir1857-3p   | 5    | 25  | 48 | 173 | 2.32   | 3.26  | 5.11  |
| osa-mir1857-5p   | 0    | 3   | 0  | 0   | 2.00   | 0.00  | 0.00  |
| osa-mir1857.5p.2 | 0    | 0   | 0  | 0   | -0.58  | -0.58 | -0.58 |
| osa-mir1858      | 0    | 0   | 0  | 0   | 0.00   | 0.00  | 0.00  |
| osa-mir1859      | 0    | 4   | 0  | 0   | 2.32   | 0.00  | 0.00  |
| osa-mir1860-3p   | 14   | 0   | 0  | 0   | -3.91  | -3.91 | -3.91 |
| osa-mir1860-5p   | 2    | 0   | 0  | 0   | -1.58  | -1.58 | -1.58 |
| osa-mir1861      | 6    | 0   | 0  | 0   | -2.81  | -2.81 | -2.81 |
| osa-mir1862      | 193  | 17  | 67 | 43  | -3.50  | -1.53 | -2.17 |
| osa-mir1863      | 1362 | 6   | 2  | 37  | -7.83  | -9.41 | -5.20 |
| osa-mir1863b     | 8    | 0   | 0  | 0   | -3.16  | -3.16 | -3.16 |
| osa-mir1863c     | 2    | 0   | 0  | 0   | -1.45  | -1.45 | -1.45 |
| osa-mir1864      | 1    | 0   | 0  | 0   | -1.00  | -1.00 | -1.00 |
| osa-mir1865-3p   | 0    | 0   | 0  | 0   | 0.00   | 0.00  | 0.00  |
| osa-mir1865-5p   | 0    | 0   | 0  | 0   | 0.00   | 0.00  | 0.00  |
| osa-mir1866      | 0    | 0   | 0  | 0   | 0.00   | 0.00  | 0.00  |
| osa-mir1867      | 232  | 22  | 0  | 25  | -3.34  | -7.86 | -3.16 |
| osa-mir1868      | 1    | 0   | 0  | 0   | -1.00  | -1.00 | -1.00 |
| osa-mir1868.2    | 364  | 0   | 0  | 0   | -17.02 | -8.51 | -8.51 |
| osa-mir1869      | 0    | 0   | 0  | 0   | 0.00   | 0.00  | 0.00  |
| osa-mir1870      | 11   | 0   | 0  | 0   | -3.58  | -3.58 | -3.58 |
| osa-mir1870-3p   | 39   | 0   | 0  | 0   | -5.32  | -5.32 | -5.32 |
| osa-mir1871      | 96   | 0   | 1  | 0   | -6.60  | -5.60 | -6.60 |
| osa-mir1872      | 0    | 0   | 0  | 0   | 0.00   | 0.00  | 0.00  |
| osa-mir1873      | 24   | 30  | 2  | 78  | 0.32   | -3.58 | 1.70  |
| osa-mir1873.2    | 8    | 0   | 0  | 0   | -3.17  | -3.17 | -3.17 |
| osa-mir1874-3p   | 0    | 0   | 0  | 0   | 0.00   | 0.00  | 0.00  |
| osa-mir1874-5p   | 0    | 0   | 0  | 0   | 0.00   | 0.00  | 0.00  |
| osa-mir1875      | 3    | 0   | 0  | 0   | -2.00  | -2.00 | -2.00 |
| osa-mir1876      | 34   | 0   | 1  | 0   | -5.13  | -4.13 | -5.13 |
| osa-mir1877      | 0    | 0   | 0  | 0   | 0.00   | 0.00  | 0.00  |



|                |     |     |    |     |       |       |       |
|----------------|-----|-----|----|-----|-------|-------|-------|
| osa-mir1878    | 15  | 0   | 1  | 0   | -4.00 | -3.00 | -4.00 |
| osa-mir1879    | 7   | 4   | 0  | 10  | -0.68 | -3.00 | 0.46  |
| osa-mir1880    | 1   | 0   | 0  | 0   | -1.00 | -1.00 | -1.00 |
| osa-mir1881    | 0   | 0   | 0  | 0   | 0.00  | 0.00  | 0.00  |
| osa-mir1882    | 172 | 41  | 89 | 11  | -2.07 | -0.95 | -3.97 |
| osa-mir1883    | 9   | 11  | 0  | 11  | 0.26  | -3.32 | 0.26  |
| osa-mir1884    | 125 | 188 | 5  | 159 | 0.59  | -4.64 | 0.35  |
| osa-miR2862    | 1   | 0   | 84 | 11  | -0.24 | 5.60  | 2.82  |
| osa-miR2863a   | 1   | 2   | 0  | 0   | 0.47  | -1.32 | -1.32 |
| osa-miR2863b   | 3   | 0   | 0  | 7   | -1.43 | -1.99 | 1.00  |
| osa-miR2864.1  | 5   | 1   | 0  | 39  | -1.33 | -2.63 | 2.69  |
| osa-miR2864.2  | 4   | 2   | 0  | 26  | -1.00 | -2.38 | 2.35  |
| osa-miR2865    | 1   | 0   | 0  | 0   | -0.74 | -1.16 | -1.16 |
| osa-miR2866    | 1   | 0   | 0  | 0   | -0.29 | -0.80 | -0.80 |
| osa-miR2867    | 0   | 0   | 0  | 0   | 0.13  | -0.32 | -0.32 |
| osa-miR2868    | 0   | 0   | 0  | 5   | -0.32 | -0.32 | 2.30  |
| osa-miR2869    | 8   | 0   | 0  | 0   | -2.56 | -3.12 | -3.12 |
| osa-miR2870    | 3   | 1   | 1  | 0   | -1.07 | -1.13 | -1.99 |
| osa-miR2871a   | 53  | 5   | 1  | 31  | -3.27 | -4.91 | -0.75 |
| osa-miR2871b   | 53  | 5   | 1  | 31  | -3.27 | -4.91 | -0.75 |
| osa-miR2872    | 16  | 0   | 1  | 7   | -3.54 | -3.22 | -1.00 |
| osa-miR2873    | 92  | 5   | 2  | 52  | -4.02 | -4.75 | -0.81 |
| osa-miR2874    | 84  | 0   | 0  | 0   | -6.04 | -6.41 | -6.41 |
| osa-miR2875    | 9   | 0   | 0  | 0   | -3.28 | -3.28 | -3.28 |
| osa-miR2876.1  | 3   | 2   | 0  | 24  | -0.43 | -1.99 | 2.63  |
| osa-miR2876.2  | 7   | 3   | 0  | 41  | -1.17 | -3.08 | 2.32  |
| osa-miR2877    | 5   | 0   | 0  | 13  | -2.51 | -2.51 | 1.30  |
| osa-miR2878-5p | 54  | 1   | 0  | 3   | -4.87 | -5.79 | -3.76 |
| osa-miR2878-3p | 107 | 0   | 0  | 0   | -6.54 | -6.75 | -6.75 |
| osa-miR2879    | 23  | 0   | 0  | 0   | -4.59 | -4.59 | -4.59 |
| osa-miR2880    | 3   | 0   | 0  | 0   | -1.99 | -1.99 | -1.99 |
| osa-miR2905    | 8   | 0   | 0  | 8   | -3.12 | -3.12 | 0.12  |

<sup>a</sup>Normalized number, which divided the reads of each miRNA by total small RNA reads in each database, and multiplied by 10<sup>6</sup>.

<sup>b</sup>For the miRNAs that had no reads in the Total or AGO1s databases, fold-enrichment was calculated using normalized reads+1.

**Supplemental Table 3.** Prediction and Validation of Rice miRNA Targets

| miRNA family      | Predicted targets | Mispair score | Cleavage site | Confirmation of targets | Annotation of targets                                          |
|-------------------|-------------------|---------------|---------------|-------------------------|----------------------------------------------------------------|
| <b>osa-miR156</b> | Os01g69830        | 1             | 1163          | -                       | teosinte glume architecture 1, putative, expressed             |
|                   | Os02g04680        | 2             | 1961          | 1_3_13(II)              | squamosa promoter-binding-like protein 10, putative, expressed |
|                   | Os02g07780        | 1             | 2231          | 0_1_2(II)               | squamosa promoter-binding-like protein 10, putative, expressed |
|                   | Os04g46580        | 1             | 828           | -                       | SBP domain containing protein, expressed                       |
|                   | Os06g45310        | 1             | 864           | 0_3_1(II)               | squamosa promoter-binding-like protein 11, putative, expressed |
|                   | Os06g49010        | 1             | 2028          | 0_2_1(II)               | squamosa promoter-binding-like protein 11, putative, expressed |
|                   | Os07g32170        | 2             | 862           | 0_2_0(II)               | SBP domain containing protein, expressed                       |
|                   | Os08g39890        | 1             | 1002          | -                       | squamosa promoter-binding-like protein 9, putative, expressed  |
|                   | Os08g41940        | 1             | 1064          | -                       | teosinte glume architecture 1, putative, expressed             |
|                   | Os09g31438        | 1             | 819           | -                       | squamosa promoter-binding-like protein 9, putative, expressed  |
|                   | Os09g32944        | 1             | 1044          | -                       | teosinte glume architecture 1, putative, expressed             |
|                   | Os11g30370        | 1             | 477           | 0_2_1(I)                | teosinte glume architecture 1, putative, expressed             |
|                   | <b>osa-miR159</b> | Os01g11430    | 3.5           | 1123                    | 0_1_0(III)                                                     |
| Os01g12700        |                   | 3             | 814           | -                       | myb-like DNA-binding domain containing protein                 |
| Os01g59660        |                   | 3.5           | 1271          | 0_35_0(II)              | transcription factor GAMYB, putative, expressed                |
| Os03g21380        |                   | 4             | 1527          | -                       | calcium-binding protein CAST, putative, expressed              |
| Os03g38210        |                   | 4             | 949           | -                       | myb-like DNA-binding domain containing protein, expressed      |
| Os04g46384        |                   | 4             | 171           | -                       | DUO1, putative                                                 |
| Os05g41166        |                   | 3             | 1079          | -                       | transcription factor GAMYB, putative, expressed                |
| Os05g42240        |                   | 3             | 637           | -                       | hypothetical protein                                           |
| Os06g40330        |                   | 3.5           | 1429          | 0_2_0(II)               | myb-like DNA-binding domain containing protein, expressed      |
| Os09g36650        |                   | 3.5           | 710           | -                       | expressed protein                                              |
| Os10g05230        |                   | 4             | 346           | 0_1_0(III)              | protein binding protein, putative, expressed                   |
| <b>osa-miR160</b> | Os02g41800        | 1             | 1495          | 0_7_0(II)               | auxin response factor 16, putative, expressed                  |
|                   | Os04g43910        | 1             | 1355          | 0_3_0(II)               | auxin response factor 16, putative, expressed                  |
|                   | Os04g59430        | 2             | 1345          | 0_2_0(I)                | B3 DNA binding domain containing protein, expressed            |
|                   | Os06g47150        | 1             | 2053          | 0_149_0(I)              | auxin response factor 16, putative, expressed                  |
|                   | Os09g29160        | 2.5           | 1462          | -                       | expressed protein                                              |
|                   | Os10g33940        | 1             | 1646          | 0_149_0(I)              | auxin response factor 16, putative, expressed                  |
| <b>osa-miR162</b> | Os03g02970        | 2             | 2989          | -                       | endoribonuclease Dicer, putative, expressed                    |
| <b>osa-miR164</b> | Os02g36880        | 3             | 852           | 0_10_0(I)               | NAC domain protein NAC5, putative, expressed                   |
|                   | Os04g38720        | 3             | 811           | 0_10_0(II)              | NAC domain protein NAC5, putative, expressed                   |
|                   | Os06g23650        | 2             | 805           | -                       | CUC2, putative, expressed                                      |
|                   | Os06g46270        | 2             | 965           | 0_4_0(I)                | NAC domain-containing protein 21/22, putative, expressed       |
|                   | Os12g05260        | 3             | 213           | 0_1_0(III)              | phytosulfokines 5 precursor, putative, expressed               |
|                   | Os12g41680        | 2             | 922           | 0_24_0(I)               | NAC domain-containing protein 21/22, putative, expressed       |
| <b>osa-miR166</b> | Os01g33740        | 2.5           | 1565          | -                       | retrotransposon protein, putative, unclassified                |
|                   | Os02g45380        | 3             | 188           | -                       | antiporter/ drug transporter/ transporter, putative, expressed |

|                   |            |     |      |            |                                                                    |
|-------------------|------------|-----|------|------------|--------------------------------------------------------------------|
|                   | Os02g49670 | 1   | 2599 | -          | zinc knuckle family protein, expressed                             |
|                   | Os03g01890 | 3   | 1100 | 0_1_0(III) | rolled leaf1, putative, expressed                                  |
|                   | Os03g10290 | 3   | 1052 | -          | hypothetical protein                                               |
|                   | Os03g34270 | 4   | 2015 | -          | retrotransposon protein, putative, unclassified                    |
|                   | Os03g35380 | 4   | 2015 | -          | retrotransposon protein, putative, unclassified                    |
|                   | Os03g43930 | 3   | 966  | -          | class III HD-Zip protein 4, putative, expressed                    |
|                   | Os03g56920 | 3.5 | 1544 | -          | conserved hypothetical protein                                     |
|                   | Os04g48290 | 3   | 409  | 0_1_0(III) | antiporter/ drug transporter/ transporter, putative, expressed     |
|                   | Os04g49300 | 4   | 344  | -          | retrotransposon protein, putative, unclassified                    |
|                   | Os05g14610 | 4   | 1622 | -          | retrotransposon protein, putative, unclassified                    |
|                   | Os06g40000 | 4   | 1853 | -          | retrotransposon protein, putative, unclassified                    |
|                   | Os07g33120 | 4   | 2161 | -          | expressed protein                                                  |
|                   | Os09g06140 | 4   | 350  | -          | retrotransposon protein, putative, unclassified                    |
|                   | Os10g33960 | 3   | 935  | 0_2_1(II)  | HB1, putative, expressed                                           |
|                   | Os11g29890 | 4   | 1829 | -          | retrotransposon protein, putative, unclassified                    |
|                   | Os11g45899 | 4   | 203  | -          | retrotransposon protein, putative, unclassified                    |
|                   | Os12g41860 | 3   | 888  | -          | class III HD-Zip protein 4, putative, expressed                    |
|                   | Os12g43900 | 3   | 1340 | -          | retrotransposon protein, putative, LINE subclass                   |
| <b>osa-miR167</b> | Os04g57610 | 4   | 2669 | 0_26_0(II) | auxin response factor 8, putative, expressed                       |
|                   | Os07g29820 | 4   | 2880 | -          | NBS-LRR disease resistance protein, putative, expressed            |
| <b>osa-miR168</b> | Os02g45070 | 0   | 574  | -          | PINHEAD protein, putative, expressed                               |
|                   | Os04g40750 | 2   | 396  | -          | expressed protein                                                  |
|                   | Os04g47870 | 1   | 678  | -          | PINHEAD protein, putative, expressed                               |
|                   | Os06g42210 | 2   | 396  | -          | hypothetical protein                                               |
|                   | Os07g49000 | 3   | 687  | -          | heat shock protein binding protein, putative, expressed            |
| <b>osa-miR169</b> | Os02g53620 | 3   | 999  | 0_7_0(II)  | nuclear transcription factor Y subunit A-3, putative, expressed    |
|                   | Os03g07880 | 3.5 | 1004 | 0_311_1(I) | nuclear transcription factor Y subunit A-3, putative, expressed    |
|                   | Os03g29760 | 3.5 | 1295 | 3_44_0(II) | nuclear transcription factor Y subunit A-8, putative, expressed    |
|                   | Os07g06470 | 2.5 | 848  | 0_1_0(III) | nuclear transcription factor Y subunit A-10, putative, expressed   |
|                   | Os07g41720 | 3.5 | 1180 | 0_39_2(II) | nuclear transcription factor Y subunit A-3, putative, expressed    |
|                   | Os12g42400 | 3   | 1267 | 0_556_7(I) | nuclear transcription factor Y subunit A-2, putative, expressed    |
| <b>osa-miR171</b> | Os02g44360 | 0   | 1362 | 0_12_0(II) | SCARECROW gene regulator, putative, expressed                      |
|                   | Os02g44370 | 0   | 1537 | 0_4_0(II)  | nodulation signaling pathway 2 protein, putative, expressed        |
|                   | Os03g04300 | 2   | 2090 | -          | ankyrin repeat protein, chloroplast precursor, putative, expressed |
|                   | Os04g46860 | 0   | 1335 | 0_5_0(II)  | scarecrow-like 6, putative, expressed                              |
|                   | Os06g01620 | 0   | 467  | -          | scarecrow-like 6, putative, expressed                              |
|                   | Os10g40390 | 1   | 179  | -          | scarecrow-like 6, putative                                         |
|                   | Os05g34460 | 4   | 1968 | -          | protease Do-like 4, mitochondrial precursor, putative, expressed   |
|                   | Os03g15680 | 1.5 | 473  | -          | nodulation signaling pathway 2 protein, putative                   |
|                   | Os12g18080 | 3.5 | 3390 | -          | retrotransposon protein, putative, unclassified                    |
| <b>osa-miR172</b> | Os03g60430 | 2   | 1241 | -          | floral homeotic protein, putative, expressed                       |

|                      |            |     |      |            |                                                                                  |
|----------------------|------------|-----|------|------------|----------------------------------------------------------------------------------|
|                      | Os04g55560 | 4   | 1788 | 0_5_1(II)  | AP2 domain containing protein, expressed                                         |
|                      | Os05g03040 | 2   | 1977 | 0_37_1(II) | floral homeotic protein APETALA2, putative, expressed                            |
|                      | Os06g43220 | 3   | 1425 | -          | floral homeotic protein APETALA2, putative, expressed                            |
|                      | Os07g13170 | 2   | 1415 | 0_6_0(II)  | floral homeotic protein, putative, expressed                                     |
| <b>osa-miR319</b>    | Os01g59660 | 4   | 1358 | -          | transcription factor GAMYB, putative, expressed                                  |
|                      | Os03g57190 | 2.5 | 1189 | 0_1_0(III) | TCP family transcription factor containing protein, expressed                    |
|                      | Os07g05720 | 2.5 | 1339 | 0_1_0(III) | TCP family transcription factor containing protein, expressed                    |
|                      | Os12g42190 | 3.5 | 857  | -          | transposon protein, putative, unclassified, expressed                            |
| <b>osa-miR390</b>    | Os01g33110 | 4   | 1675 | -          | receptor-like protein kinase 5 precursor, putative, expressed                    |
|                      | Os02g10100 | 2   | 2181 | -          | leucine-rich repeat receptor protein kinase EXS precursor, putative, expressed   |
|                      | Os08g34650 | 4   | 872  | -          | receptor-like protein kinase precursor, putative, expressed                      |
|                      | Os11g36140 | 2.5 | 1044 | -          | receptor-like protein kinase precursor, putative, expressed                      |
| <b>osa-miR393</b>    | Os03g36080 | 3.5 | 732  | -          | expressed protein                                                                |
|                      | Os04g32460 | 2.5 | 2235 | 0_7_2(II)  | transport inhibitor response 1 protein, putative, expressed                      |
|                      | Os04g58734 | 2.5 | 296  | -          | expressed protein                                                                |
|                      | Os05g05800 | 2.5 | 1694 | 0_21_1(I)  | transport inhibitor response 1 protein, putative, expressed                      |
| <b>osa-miR394</b>    | Os01g69940 | 0   | 1251 | 1_48_7(II) | F-box domain containing protein, expressed                                       |
|                      | Os05g51150 | 3   | 1405 | -          | RNA polymerase sigma factor rpoD, putative, expressed                            |
| <b>osa-miR395</b>    | Os03g09930 | 4   | 122  | -          | sulfate transporter 2.1, putative, expressed                                     |
|                      | Os03g09940 | 3   | 329  | -          | low affinity sulphate transporter 3, putative, expressed                         |
|                      | Os03g53230 | 1   | 606  | -          | bifunctional 3-phosphoadenosine 5-phosphosulfate synthetase, putative, expressed |
|                      | Os06g46480 | 3.5 | 1115 | -          | expressed protein                                                                |
|                      | Os10g35870 | 4   | 663  | -          | membrane steroid-binding protein 1, putative, expressed                          |
| <b>osa-miR395a.2</b> | Os03g09940 | 2   | 328  | -          | low affinity sulphate transporter 3, putative, expressed                         |
|                      | Os03g53230 | 1   | 605  | -          | bifunctional 3-phosphoadenosine 5-phosphosulfate synthetase, putative, expressed |
|                      | Os03g09930 | 3   | 121  | -          | sulfate transporter 2.1, putative, expressed                                     |
| <b>osa-miR396</b>    | Os02g45570 | 1   | 640  | -          | growth-regulating factor, putative, expressed                                    |
|                      | Os02g47280 | 1   | 678  | 0_12_0(I)  | growth-regulating factor, putative, expressed                                    |
|                      | Os02g53690 | 1   | 581  | -          | atGRF5, putative, expressed                                                      |
|                      | Os03g47140 | 1   | 958  | -          | atGRF2, putative, expressed                                                      |
|                      | Os03g51970 | 3   | 430  | -          | growth-regulating factor 1, putative, expressed                                  |
|                      | Os04g24190 | 3   | 838  | -          | growth-regulating factor 1, putative                                             |
|                      | Os04g48510 | 3   | 869  | -          | transcription activator, putative, expressed                                     |
|                      | Os04g51190 | 1   | 546  | -          | growth-regulating factor, putative, expressed                                    |
|                      | Os06g02560 | 1   | 616  | 0_41_1(II) | growth-regulating factor, putative, expressed                                    |
|                      | Os06g10310 | 1   | 293  | -          | growth-regulating factor 1, putative                                             |
|                      | Os11g35030 | 3.5 | 880  | 0_7_0(I)   | expressed protein                                                                |
|                      | Os12g29980 | 3   | 743  | -          | atGRF2, putative, expressed                                                      |
| <b>osa-miR397</b>    | Os01g44330 | 4   | 692  | -          | L-ascorbate oxidase precursor, putative, expressed                               |
|                      | Os01g62490 | 1   | 772  | -          | L-ascorbate oxidase precursor, putative, expressed                               |

|                       |            |     |      |            |                                                                               |
|-----------------------|------------|-----|------|------------|-------------------------------------------------------------------------------|
|                       | Os01g63200 | 3   | 677  | -          | L-ascorbate oxidase precursor, putative, expressed                            |
|                       | Os03g16610 | 4   | 792  | -          | L-ascorbate oxidase precursor, putative, expressed                            |
|                       | Os05g38410 | 2   | 758  | -          | L-ascorbate oxidase precursor, putative, expressed                            |
|                       | Os05g38420 | 2   | 758  | -          | L-ascorbate oxidase precursor, putative, expressed                            |
|                       | Os11g48060 | 2   | 1169 | -          | monocopper oxidase-like protein SKS1 precursor, putative, expressed           |
|                       | Os01g63180 | 4   | 689  | -          | L-ascorbate oxidase precursor, putative, expressed                            |
|                       | Os12g15680 | 4   | 758  | -          | L-ascorbate oxidase precursor, putative, expressed                            |
| <b>osa-miR397a.2</b>  | Os01g44330 | 3   | 689  | -          | L-ascorbate oxidase precursor, putative, expressed                            |
| <b>osa-miR397b.2</b>  | Os01g61160 | 2   | 791  | -          | L-ascorbate oxidase precursor, putative, expressed                            |
|                       | Os01g62490 | 2   | 769  | -          | L-ascorbate oxidase precursor, putative, expressed                            |
|                       | Os01g63180 | 2   | 686  | -          | L-ascorbate oxidase precursor, putative, expressed                            |
|                       | Os01g63190 | 3   | 762  | -          | L-ascorbate oxidase precursor, putative, expressed                            |
|                       | Os03g16610 | 3   | 789  | -          | L-ascorbate oxidase precursor, putative, expressed                            |
|                       | Os05g38410 | 1   | 755  | -          | L-ascorbate oxidase precursor, putative, expressed                            |
|                       | Os05g38420 | 1   | 755  | -          | L-ascorbate oxidase precursor, putative, expressed                            |
|                       | Os11g48060 | 3   | 1166 | -          | monocopper oxidase-like protein SKS1 precursor, putative, expressed           |
|                       | Os12g15680 | 2   | 755  | -          | L-ascorbate oxidase precursor, putative, expressed                            |
| <b>osa-miR398</b>     | Os07g46990 | 3   | 135  | 0_34_0(II) | superoxide dismutase 2, putative, expressed                                   |
|                       | Os11g09780 | 4   | 511  | -          | hypothetical protein                                                          |
| <b>osa-miR399</b>     | Os04g33860 | 3.5 | 505  | -          | expressed protein                                                             |
|                       | Os05g45350 | 3.5 | 1121 | -          | electron transporter/ heat shock protein binding protein, putative, expressed |
|                       | Os05g48390 | 2.5 | 832  | -          | ubiquitin conjugating enzyme, putative, expressed                             |
|                       | Os08g45000 | 4   | 303  | -          | inorganic phosphate transporter 1-7, putative, expressed                      |
|                       | Os10g31864 | 4   | 4094 | -          | conserved hypothetical protein                                                |
| <b>osa-miR408</b>     | Os01g03530 | 1.5 | 1390 | -          | copper ion binding protein, putative, expressed                               |
|                       | Os03g15340 | 1   | 96   | -          | chemocyanin precursor, putative, expressed                                    |
|                       | Os06g15600 | 1.5 | 31   | -          | chemocyanin precursor, putative                                               |
| <b>osa-miR437</b>     | Os01g38190 | 4   | 1463 | -          | expressed protein                                                             |
|                       | Os02g42350 | 0.5 | 1542 | -          | nitrilase 4, putative, expressed                                              |
|                       | Os02g48900 | 4   | 281  | -          | aspartic proteinase nepenthesin-1 precursor, putative, expressed              |
|                       | Os06g46670 | 1   | 3866 | -          | glutamate receptor 3.4 precursor, putative, expressed                         |
| <b>osa-miR437-3p.</b> | Os06g46670 | 1   | 3532 | -          | glutamate receptor 3.4 precursor, putative, expressed                         |
|                       | Os02g42350 | 1.5 | 1542 | -          | nitrilase 4, putative, expressed                                              |
| <b>osa-miR437-3p.</b> | Os06g46670 | 3   | 3524 | -          | glutamate receptor 3.4 precursor, putative, expressed                         |
|                       | Os02g42350 | 3   | 1534 | -          | nitrilase 4, putative, expressed                                              |
| <b>osa-miR439</b>     | Os01g23940 | 3.5 | 117  | -          | hypothetical protein                                                          |
|                       | Os01g26340 | 0   | 579  | -          | dirigent-like protein, putative                                               |
|                       | Os01g36270 | 3.5 | 117  | -          | hypothetical protein                                                          |
|                       | Os06g19250 | 2   | 590  | -          | conserved hypothetical protein                                                |
| <b>osa-miR444.1</b>   | Os02g36924 | 4   | 551  | -          | MADS-box transcription factor 27, putative, expressed                         |

|                       |            |     |      |            |                                                                                  |
|-----------------------|------------|-----|------|------------|----------------------------------------------------------------------------------|
|                       | Os02g49840 | 0   | 619  | -          | MADS-box transcription factor 57, putative, expressed                            |
|                       | Os04g38780 | 4   | 103  | -          | MADS-box transcription factor 27, putative, expressed                            |
|                       | Os08g33488 | 0   | 317  | -          | MADS-box transcription factor 23, putative, expressed                            |
| <b>osa-miR444.2</b>   | Os02g36924 | 4   | 556  | 0_26_0(I)  | MADS-box transcription factor 27, putative, expressed                            |
|                       | Os02g49840 | 0   | 624  | 0_1_0(III) | MADS-box transcription factor 57, putative, expressed                            |
|                       | Os04g38780 | 4   | 108  | 0_6_0(II)  | MADS-box transcription factor 27, putative, expressed                            |
|                       | Os05g47560 | 4   | 1447 | 0_6_0(II)  | serine/threonine-protein kinase SNT7, chloroplast precursor, putative, expressed |
|                       | Os08g06510 | 1.5 | 1382 | 0_14_0(I)  | zinc finger, C3HC4 type family protein, expressed                                |
|                       | Os08g33479 | 1   | 487  | -          | expressed protein                                                                |
|                       | Os08g33488 | 0   | 322  | -          | MADS-box transcription factor 23, putative, expressed                            |
| <b>osa-miR444.3</b>   | Os02g49840 | 0   | 645  | 0_4_0(II)  | MADS-box transcription factor 57, putative, expressed                            |
| <b>osa-miR528</b>     | Os01g62600 | 4   | 50   | -          | laccase, putative                                                                |
|                       | Os06g06050 | 3.5 | 2659 | 0_1_0(III) | F-box/LRR-repeat MAX2, putative, expressed                                       |
|                       | Os06g37150 | 3   | 2009 | 0_20_0(I)  | L-ascorbate oxidase precursor, putative, expressed                               |
|                       | Os07g38290 | 2   | 538  | -          | copper ion binding protein, putative, expressed                                  |
|                       | Os10g24090 | 3   | 588  | -          | expressed protein                                                                |
| <b>osa-miR529</b>     | Os08g39890 | 1   | 998  | -          | squamosa promoter-binding-like protein 9, putative, expressed                    |
|                       | Os09g31438 | 1.5 | 815  | -          | squamosa promoter-binding-like protein 9, putative, expressed                    |
| <b>osa-miR530-5p</b>  | Os01g56780 | 2   | 440  | -          | plus-3 domain containing protein, expressed                                      |
|                       | Os02g14990 | 2.5 | 599  | 0_27_2(I)  | zinc finger, C3HC4 type family protein, expressed                                |
|                       | Os12g44340 | 4   | 920  | -          | ATMAP70-2, putative, expressed                                                   |
| <b>osa-miR531</b>     | Os08g04990 | 0   | 28   | -          | retrotransposon protein, putative, unclassified                                  |
| <b>osa-miR535</b>     | Os02g09080 | 4   | 49   | -          | expressed protein                                                                |
|                       | Os03g14880 | 3.5 | 1745 | -          | expressed protein                                                                |
| <b>osa-miR820</b>     | Os03g02010 | 2.5 | 315  | -          | DNA cytosine methyltransferase Zmet3, putative, expressed                        |
|                       | Os12g16350 | 4   | 93   | -          | CHY1, putative, expressed                                                        |
| <b>osa-miR820a-5p</b> | Os03g02010 | 2.5 | 315  | -          | DNA cytosine methyltransferase Zmet3, putative, expressed                        |
|                       | Os11g03310 | 3   | 140  | -          | NAC domain-containing protein 77, putative                                       |
| <b>osa-miR820a-5p</b> | Os03g02010 | 2.5 | 315  | -          | DNA cytosine methyltransferase Zmet3, putative, expressed                        |
|                       | Os11g03310 | 3   | 140  | -          | NAC domain-containing protein 77, putative                                       |
| <b>osa-miR820b-5p</b> | Os03g02010 | 2.5 | 315  | -          | DNA cytosine methyltransferase Zmet3, putative, expressed                        |
|                       | Os11g03310 | 3   | 140  | -          | NAC domain-containing protein 77, putative                                       |
| <b>osa-miR820b-5p</b> | Os03g02010 | 2.5 | 315  | -          | DNA cytosine methyltransferase Zmet3, putative, expressed                        |
|                       | Os11g03310 | 3   | 140  | -          | NAC domain-containing protein 77, putative                                       |
| <b>osa-miR820c-5p</b> | Os03g02010 | 2.5 | 315  | -          | DNA cytosine methyltransferase Zmet3, putative, expressed                        |
|                       | Os11g03310 | 3   | 140  | -          | NAC domain-containing protein 77, putative                                       |
| <b>osa-miR820c-5p</b> | Os03g02010 | 2.5 | 315  | -          | DNA cytosine methyltransferase Zmet3, putative, expressed                        |
|                       | Os11g03310 | 3   | 140  | -          | NAC domain-containing protein 77, putative                                       |
| <b>osa-miR827</b>     | Os02g43314 | 3   | 649  | -          | expressed protein                                                                |
| <b>osa-miR1317</b>    | Os03g02010 | 4   | 387  | -          | DNA cytosine methyltransferase Zmet3, putative, expressed                        |
| <b>osa-miR1317-3p</b> | Os03g02010 | 3.5 | 411  | -          | DNA cytosine methyltransferase Zmet3, putative, expressed                        |
| <b>osa-miR1318</b>    | Os03g59770 | 1   | 127  | -          | calcium-binding allergen Ole e 8, putative, expressed                            |

|                       |            |     |      |            |                                                                          |
|-----------------------|------------|-----|------|------------|--------------------------------------------------------------------------|
|                       | Os03g59790 | 1   | 55   | -          | calcium-binding protein, putative                                        |
|                       | Os03g59870 | 1   | 322  | -          | calmodulin-like protein, putative, expressed                             |
|                       | Os04g51610 | 1   | 140  | -          | calcium-transporting ATPase 9, plasma membrane-type, putative, expressed |
| <b>osa-miR1320</b>    | Os01g64100 | 2.5 | 1081 | -          | acidic endochitinase precursor, putative, expressed                      |
|                       | Os05g47550 | 2.5 | 2234 | 1_1_1(II)  | clathrin assembly protein, putative, expressed                           |
|                       | Os06g10980 | 3.5 | 1816 | -          | fucosyltransferase 7, putative, expressed                                |
| <b>osa-miR1320-3p</b> | Os03g13800 | 2.5 | 845  | -          | NHP2-like protein 1, putative, expressed                                 |
|                       | Os06g10980 | 3.5 | 1768 | -          | fucosyltransferase 7, putative, expressed                                |
|                       | Os05g31230 | 3.5 | 707  | -          | N-acetyltransferase ESCO1, putative, expressed                           |
| <b>osa-miR1423</b>    | Os11g28540 | 4   | 55   | -          | expressed protein                                                        |
|                       | Os06g09560 | 3   | 826  | -          | dnaJ protein, putative, expressed                                        |
| <b>osa-miR1423-5p</b> | Os06g09560 | 3   | 826  | -          | dnaJ protein, putative, expressed                                        |
| <b>osa-miR1424</b>    | Os04g33940 | 4   | 1721 | -          | expressed protein                                                        |
| <b>osa-miR1425</b>    | Os08g01640 | 3.5 | 1464 | -          | rf1 protein, mitochondrial precursor, putative, expressed                |
|                       | Os08g01650 | 3   | 1336 | -          | rf1 protein, mitochondrial precursor, putative, expressed                |
|                       | Os08g17970 | 1.5 | 125  | -          | hypothetical protein                                                     |
|                       | Os10g35230 | 3.5 | 1448 | -          | rf1 protein, mitochondrial precursor, putative, expressed                |
|                       | Os10g35240 | 3.5 | 1307 | 1_322_2(I) | rf1 protein, mitochondrial precursor, putative, expressed                |
|                       | Os10g35436 | 3   | 1319 | -          | rf1 protein, mitochondrial precursor, putative, expressed                |
|                       | Os10g35640 | 2.5 | 1387 | -          | rf1 protein, mitochondrial precursor, putative, expressed                |
| <b>osa-miR1427</b>    | Os06g49340 | 2.5 | 305  | -          | F-box domain containing protein, expressed                               |
| <b>osa-miR1428-3p</b> | Os03g17980 | 4   | 2288 | 2_2_3(II)  | carbon catabolite derepressing protein kinase, putative, expressed       |
| <b>osa-miR1429</b>    | Os04g01340 | 4   | 861  | -          | retrotransposon protein, putative, LINE subclass                         |
| <b>osa-miR1432</b>    | Os03g59770 | 1   | 128  | -          | calcium-binding allergen Ole e 8, putative, expressed                    |
|                       | Os03g59790 | 1   | 56   | -          | calcium-binding protein, putative                                        |
|                       | Os03g59870 | 1   | 323  | -          | calmodulin-like protein, putative, expressed                             |
|                       | Os04g51610 | 3   | 141  | -          | calcium-transporting ATPase 9, plasma membrane-type, putative, expressed |
| <b>osa-miR1433</b>    | Os05g43070 | 2.5 | 20   | -          | hypothetical protein                                                     |
| <b>osa-miR1435</b>    | Os04g44354 | 2.5 | 1380 | -          | UDP-glucuronosyl and UDP-glucosyl transferase family protein, expressed  |
| <b>osa-miR1438</b>    | Os06g09230 | 2.5 | 2873 | -          | serine threonine kinase, putative, expressed                             |
| <b>osa-miR1846-3p</b> | Os02g43950 | 2   | 58   | -          | expressed protein                                                        |
|                       | Os02g43950 | 0.5 | 87   | -          | expressed protein                                                        |
|                       | Os10g12320 | 0.5 | 87   | -          | hypothetical protein                                                     |
|                       | Os02g43950 | 2.5 | 58   | -          | expressed protein                                                        |
|                       | Os10g12320 | 2   | 58   | -          | hypothetical protein                                                     |
| <b>osa-miR1850</b>    | Os04g33510 | 3   | 914  | -          | expressed protein                                                        |
|                       | Os04g47410 | 3   | 1326 | 0_1_2(II)  | metal ion binding protein, putative, expressed                           |
|                       | Os10g36650 | 2.5 | 14   | -          | actin-2, putative, expressed                                             |
| <b>osa-miR1851</b>    | Os01g61520 | 1   | 381  | -          | hypothetical protein                                                     |
|                       | Os03g52030 | 4   | 53   | -          | hypothetical protein                                                     |

|                       |            |     |      |            |                                                                        |
|-----------------------|------------|-----|------|------------|------------------------------------------------------------------------|
| <b>osa-miR1854-3p</b> | Os11g34680 | 4   | 271  | -          | RNA recognition motif containing protein, putative, expressed          |
| <b>osa-miR1855</b>    | Os01g14860 | 4   | 2079 | -          | glycogen synthase kinase-3 homolog MsK-3, putative, expressed          |
| <b>osa-miR1857-3p</b> | Os01g35880 | 4   | 293  | -          | hypothetical protein                                                   |
|                       | Os11g45590 | 3   | 1647 | 0_1_0(III) | splicing factor U2AF 65 kDa subunit, putative, expressed               |
| <b>osa-miR1857-5p</b> | Os12g16250 | 3   | 338  | -          | isoflavone reductase, putative, expressed                              |
| <b>osa-miR1859</b>    | Os02g43780 | 4   | 393  | -          | protein dimerization, putative                                         |
| <b>osa-miR1860-3p</b> | Os09g36100 | 3.5 | 1166 | -          | expressed protein                                                      |
| <b>osa-miR1860-5p</b> | Os02g58390 | 3.5 | 1317 | -          | receptor-kinase isolog, putative, expressed                            |
|                       | Os12g13950 | 2.5 | 34   | -          | DNA polymerase alpha subunit B, putative, expressed                    |
| <b>osa-miR1861</b>    | Os01g63810 | 3.5 | 676  | -          | starch binding domain containing protein, expressed                    |
|                       | Os05g51790 | 3.5 | 545  | -          | ATP binding protein, putative, expressed                               |
|                       | Os02g52560 | 3   | 1694 | -          | galactoside 2-alpha-L-fucosyltransferase, putative, expressed          |
|                       | Os03g03710 | 3   | 854  | -          | exosome complex exonuclease RRP44, putative, expressed                 |
| <b>osa-miR1862</b>    | Os02g37694 | 3.5 | 1104 | -          | expressed protein                                                      |
|                       | Os07g28260 | 4   | 2175 | -          | expressed protein                                                      |
|                       | Os02g30730 | 3.5 | 2798 | -          | SART-1 family protein, expressed                                       |
|                       | Os04g31120 | 4   | 2476 | -          | influenza virus NS1A binding protein isoform 3, putative, expressed    |
|                       | Os05g37910 | 4   | 1391 | -          | expressed protein                                                      |
| <b>osa-miR1863</b>    | Os05g13804 | 4   | 49   | -          | expressed protein                                                      |
| <b>osa-miR1863b</b>   | Os06g38480 | 3   | 28   | -          | retrotransposon protein, putative, unclassified, expressed             |
| <b>osa-miR1864</b>    | Os01g14020 | 4   | 288  | -          | expressed protein                                                      |
| <b>osa-miR1866</b>    | Os04g33310 | 4   | 1352 | -          | expressed protein                                                      |
| <b>osa-miR1867</b>    | Os10g30550 | 4   | 2337 | -          | phosphoglycerate kinase, chloroplast precursor, putative, expressed    |
| <b>osa-miR1871</b>    | Os06g19610 | 3.5 | 731  | -          | steroid dehydrogenase SPM2, putative                                   |
|                       | Os08g02870 | 4   | 309  | -          | hypothetical protein                                                   |
| <b>osa-miR1872</b>    | Os06g46910 | 3.5 | 221  | -          | nucleic acid binding protein, putative, expressed                      |
|                       | Os12g14230 | 4   | 242  | -          | hypothetical protein                                                   |
| <b>osa-miR1873</b>    | Os05g01790 | 2   | 1125 | -          | OsWRKY69 - Superfamily of rice TFs having WRKY and zinc finger domains |
| <b>osa-miR1873.2</b>  | Os08g29660 | 4   | 2274 | -          | expressed protein                                                      |
| <b>osa-miR1874-3p</b> | Os02g20950 | 3   | 460  | -          | expressed protein                                                      |
| <b>osa-miR1876</b>    | Os02g05890 | 3.5 | 796  | -          | expressed protein                                                      |
|                       | Os07g41090 | 4.5 | 2252 | -          | histone deacetylase 6, putative, expressed                             |
| <b>osa-miR1879</b>    | Os05g28110 | 3.5 | 2219 | -          | retrotransposon protein, putative, unclassified                        |
|                       | Os05g33060 | 3   | 443  | -          | hypothetical protein                                                   |
|                       | Os09g15389 | 4   | 825  | -          | expressed protein                                                      |
| <b>osa-miR1882</b>    | Os03g02010 | 3.5 | 411  | -          | DNA cytosine methyltransferase Zmet3, putative, expressed              |
| <b>osa-miR1883</b>    | Os12g15260 | 3   | 314  | -          | hypothetical protein                                                   |
| <b>osa-miR1884</b>    | Os01g59720 | 2   | 845  | 2_1_1(II)  | expressed protein                                                      |
|                       | Os01g64520 | 3   | 1505 | 0_1_0(III) | uricase, putative, expressed                                           |
|                       | Os01g73250 | 4   | 1127 | -          | bundle sheath cell specific protein 1, putative, expressed             |



|                      |            |     |      |           |                                                                                             |
|----------------------|------------|-----|------|-----------|---------------------------------------------------------------------------------------------|
|                      | Os02g22610 | 2.5 | 1005 | 2_1_1(I)  | transposon protein, putative, CACTA, En/Spm sub-class                                       |
|                      | Os02g49870 | 4   | 1146 | -         | expressed protein                                                                           |
|                      | Os03g10250 | 4   | 18   | 1_4_1(I)  | expressed protein                                                                           |
|                      | Os03g19380 | 2   | 851  | 2_1_1(II) | CP12-2, putative, expressed                                                                 |
|                      | Os03g62330 | 3   | 665  | -         | expressed protein                                                                           |
|                      | Os04g09900 | 3.5 | 364  | -         | ent-kaurene synthase A, chloroplast precursor, putative, expressed                          |
|                      | Os04g58730 | 4   | 375  | -         | DNA binding protein, putative, expressed                                                    |
|                      | Os06g48240 | 1   | 1673 | -         | ATPase protein, putative, expressed                                                         |
|                      | Os07g35870 | 4   | 772  | -         | bHLH transcription factor, putative, expressed                                              |
|                      | Os09g30454 | 4   | 1197 | -         | OsWAK87 - OsWAK receptor-like protein kinase, expressed                                     |
|                      | Os09g33710 | 2   | 1802 | -         | beta-glucosidase homolog precursor, putative, expressed                                     |
|                      | Os11g34460 | 4   | 1602 | -         | adagio protein 1, putative, expressed                                                       |
|                      | Os11g34910 | 4   | 2822 | 2_1_0(II) | expressed protein                                                                           |
| <b>osa-miR2862</b>   | Os11g42420 | 3   | 372  | -         | nuclear pore protein 84 / 107 containing protein, expressed                                 |
| <b>osa-miR2864.1</b> | Os09g07154 | 3   | 278  | -         | expressed protein                                                                           |
| <b>osa-miR2864.2</b> | Os02g16270 | 2   | 898  | -         | xa1-like protein, putative, expressed                                                       |
|                      | Os12g41430 | 2   | 1493 | -         | expressed protein                                                                           |
| <b>osa-miR2865</b>   | Os01g70850 | 2.5 |      | -         | esterase PIR7B, putative, expressed                                                         |
| <b>osa-miR2868</b>   | Os11g14140 | 3   | 1302 | 1_3_1(II) | protein kinase Kelch repeat:Kelch, putative, expressed                                      |
|                      | Os11g29370 | 3   | 21   | -         | hydrolase, putative, expressed                                                              |
| <b>osa-miR2870</b>   | Os02g28400 | 3.5 | 3005 | -         | retrotransposon protein, putative, Ty3-gypsy subclass                                       |
| <b>osa-miR2905</b>   | Os08g30780 | 1.5 | 1910 | -         | ATATH3,, putative                                                                           |
|                      | Os06g39840 | 1   | 4256 | -         | retrotransposon protein, putative, unclassified                                             |
|                      | Os01g14100 | 2.5 | 1485 | -         | folate/biopterin transporter family protein, expressed                                      |
|                      | Os05g40170 | 3.5 | 1330 | -         | expressed protein                                                                           |
|                      | Os02g24134 | 3   | 1311 | -         | vacuolar protein-sorting protein 45, putative, expressed                                    |
| <b>osa-miR2872</b>   | Os07g28050 | 3   | 294  | -         | ribosome biogenesis protein RLP24, putative, expressed                                      |
| <b>osa-miR2875</b>   | Os08g42850 | 2.5 | 805  | -         | FKBP-type peptidyl-prolyl cis-trans isomerase 2, chloroplast precursor, putative, expressed |
| <b>osa-miR2877</b>   | Os03g12950 | 3.5 | 634  | -         | protein AINTEGUMENTA, putative, expressed                                                   |
| <b>osa-miR2880</b>   | Os03g40920 | 3.5 | 1347 | -         | expressed protein                                                                           |

**Supplemental Table 4. Primers and probes**

| <b>Primer</b>                                                                          | <b>Sequence (5'-3')</b>                      |
|----------------------------------------------------------------------------------------|----------------------------------------------|
| <b>Primers for generating <i>Os AGO1</i> inverted repeat</b>                           |                                              |
| XhoI-OsAGO1-F                                                                          | GGC ctcgag ATCGTATATC TGGACTCACT T           |
| BamHI-OsAGO1-R                                                                         | ATT ggatcc CCTGCGGTCT GAGCATGTTC A           |
| <b>Primers for quantitative RT-PCR</b>                                                 |                                              |
| AGO1a-F                                                                                | CTGTTATCTAAGACGGAACGACCT                     |
| AGO1a-R                                                                                | TGATTTGAGTAGCCACACTGAAAG                     |
| AGO1b-F                                                                                | GCTGTTGGACTATTCTGGGTATTG                     |
| AGO1b-R                                                                                | TCTTCAAGCACAACAAAGGTCC                       |
| AGO1c-F                                                                                | AAATCCCATAATAATCTGCCAGC                      |
| AGO1c-R                                                                                | GATGAAATGCTCAAGCCCAG                         |
| AGO1d-F                                                                                | CTACTACTGCTTCGCTTGGCTACT                     |
| AGO1d-R                                                                                | GAAATAGAATGGTGTGTCCCAGA                      |
| AGO4a-F                                                                                | TACAGGGCTTCAGTCCGTTT                         |
| AGO4a-R                                                                                | TCAACTAATAACTCCCGAATGAGG                     |
| Os06g49010-F                                                                           | AGCAGCGTAAGGAATGCATGG                        |
| Os06g49010-R                                                                           | GTGCCACAGGATTGCCATCAA                        |
| Os03g01890-F                                                                           | TTGATATGAA AACAGATGGTGCA                     |
| Os03g01890-R                                                                           | GTCAGAACAGATCGCAAGTTACA                      |
| Os04g57610-F                                                                           | CGTCTTCCCTCCTTTGGATTTCA                      |
| Os04g57610-R                                                                           | GTTAGCAGGTGTGCTTTGGGT                        |
| Os06g47150-F                                                                           | CATTCTCGCCTCCACGGAAG                         |
| Os06g47150-R                                                                           | CGGGAAATAGCACATAGGACCAA                      |
| Os03g07880-F                                                                           | CAACACAAAGCAGCAGCCTG                         |
| Os03g07880-R                                                                           | TTCGCACGACGATGATGGAGA                        |
| <b>Primers for generating miRNA target templates for <i>in vitro</i> transcription</b> |                                              |
| T7-Os06g49010-F                                                                        | TTGTAATACGACTCACTATAGGGCAACACATACAGCGGCCAAGG |
| Os06g49010-R                                                                           | GGCTGCAGCCTGGTTGTGGCT                        |
| T7-Os06g43910-F                                                                        | TTGTAATACGACTCACTATAGGGAATCCAATGGCGCACGACCA  |
| Os06g43910-F                                                                           | TAGAGCATCAGATTCCGGCTG C                      |
| T7-Os12g41680-F                                                                        | TTGTAATACGACTCACTATAGGGAGCTCCAGGCCTCCATGAACA |
| Os12g41680-R                                                                           | CCAAATTCAGGCAGGCCATGA                        |
| <b>Probes for small RNA gel blot</b>                                                   |                                              |
| AGO1-1                                                                                 | GTCTCCAGAAAATATTGCACCACAGTCTTCACAGTACCAC     |
| AGO1-2                                                                                 | TGCCCACTTGAAGGCAAGGCAAAGTGGTGTGCTGAATACT     |
| AGO1-3                                                                                 | CTCAACGATC TTACAAACCT CCATAGGCAGATAATTGGGC   |
| AGO1-4                                                                                 | AATAGCGCAGTAATCTGTTTCTCGTTAAGCCGCTTCGAGT     |
| miR156                                                                                 | GTGCTCACTCTCTTCTGTCA                         |
| miR160                                                                                 | TGGCATAACAGGGAGCCAGGCA                       |
| miR166                                                                                 | GGGGAATGAAGCCTGGTCCGA                        |
| miR167                                                                                 | TAGATCATGCTGGCAGCTTCA                        |
| miR168                                                                                 | GTCCCGATCTGCACCAAGCGA                        |
| miR171                                                                                 | GATATTGGCGCGGCTCAATCA                        |

miR528

CTCCTCTGCATGCCCTTCCA

---

Supplemental Data, Wu et al., (2009) Rice MicroRNA Effector Complexes and Targets.

### **Supplemental Method. Solexa-based small RNA cloning protocol**

**(modified from a Hannon Lab protocol)**

#### ***Required oligos:***

##### **Size markers:**

Pme18: GUACGGUUUAAACUUCGA

Pme28: AUCGAUAAAAGUUUAAACGAGCUUCCCG

##### **3' ligation:**

Modban: AMP-5'p=5'pCTGTAGGCACCATCAATdideoxyC-3'  
IDT – Product name: miRNA cloning linker 1

##### **5' ligation:**

Solexa linker: 5' GUU CAG AGU UCU ACA GUC CGA CGA UC 3'  
IDT – Custom oligo – HPLC purified

##### **RT:**

SBS3: 5'-CAAGCAGAAGACGGCATAACGATTGATGGTGCCT  
ACAG-3'  
IDT – Custom oligo – HPLC purified

##### **PCR:**

SBS5: 5'AATGATACGGCGACCACCGACAGGTTTCAGAGTTC  
TACAGTCCGA 3'  
IDT – Custom oligo – Desalt

SBS3: 5'-CAAGCAGAAGACGGCATAACGATTGATGGTGCCT  
ACAG-3'  
IDT – Custom oligo – HPLC purified

### ***Section 0. RNA Preparation***

For each sample, you will need approximately 10-30ug of enriched small RNAs.

#### Total RNA extraction protocol (for large amounts of RNAs):

Trizol

Add chloroform (spin, take top layer)

Precipitate

Resuspend in desired amount of H<sub>2</sub>O

PEG-precipitation protocol (Dalmay et al.2000 Plant Cell)

Add 30% PEG to 5% final concentration.

Add NaCl to 0.5 M final concentration.

42 ul 5 M NaCl

70 ul 30% PEG8000

308 ul total RNA (~1 mg)

20 min on ice.

Centrifuge 10 min at 13000 rpm (this pellets large RNAs)

Add ~2.5 volumes of EtOH (1 ml) to supernatant

30 min at -20

Centrifuge 15 min at 13000 rpm (this pellets small RNAs)

Discard supernatant

Wash pellet twice with 70% ethanol

Dry the pellet at RT (no visible water allowed)

Dissolve the pellet in 30 ul nuclease-free water

***Section I: Gel purification of RNA sample***

- 1 Prepare a 15% polyacrylamide/urea gel (Sequagel, National Diagnostics)
- 2 Load 10ng of <sup>32</sup>P-labeled decade marker (Ambion) as a size marker
- 3 Spike all samples with <sup>32</sup>P-labeled 18bp and 28bp RNA oligos (~10,000 counts per second)
- 4 Heat total RNA at 95°C for 5 min, then chill for 5 min
- 5 Load the sample. Run the gel at constant 10W for 1-2 hrs (until first dye front reaches the middle of the gel)
- 6 Expose the gel for 1 hr
- 7 Excise the band corresponding to the desired size of small RNA (~19-24 nt) into Eppendorf tubes, including the radio-labeled oligos
- 8 Spin briefly in a centrifuge at max speed.
- 9 Add 400µL of 0.4M NaCl
- 10 Freeze rapidly in dry ice. Incubate (thaw) overnight at room temperature with agitation. Allow overnight incubation to maximize RNA elution
- 11 (Optional) Spin gel slice homogenate through micropore filter (Ultrafree-MC, 0.22µm, Millipore) for 1 min at RT
- 12 Add 20µg glycogen and 2 volume of 100% EtOH (RNase-free)
- 13 Incubate at -20°C 3-6 hours
- 14 Spin at 4°C for 30 min
- 15 Wash with 70% EtOH. Remove all EtOH
- 16 Air dry (5-10 min). Resuspend in 13µL DEPC MQ

## ***Section II: Linker ligation***

- 1 Set up the following reaction:

|                                     |                            |
|-------------------------------------|----------------------------|
| Gel purified RNA (in water)         | 13 $\mu$ L                 |
| ATP-free T4 RNA ligase buffer (10X) | 2 $\mu$ L                  |
| DMSO                                | 2 $\mu$ L                  |
| Modban oligo (50 $\mu$ M)           | 1 $\mu$ L                  |
| T4 RLN2 (NEB)                       | 2 $\mu$ L                  |
| <u>Total</u>                        | <u>20<math>\mu</math>L</u> |
- 2 Incubate at RT for 1 hr
- 3 Add 20 $\mu$ L RNA loading dye
- 4 Heat inactivate at 95°C for 5 min
- 5 Proceed to section III

\*\*\*

10X ATP-free T4 RNA ligase buffer:

500mM Tris-HCl (pH 7.5-7.6), 100mM MgCl<sub>2</sub>, 100mM DTT, 600 $\mu$ g/mL BSA

\*\*\*

## ***Section III: Gel purification of ligated RNA product***

- 1 Prepare a 15% polyacrylamide/urea gel (Sequagel, National Diagnostics)
- 2 Load 10ng of <sup>32</sup>P-labeled decade marker (Ambion) as a size marker
- 3 Heat samples at 95°C for 5 min, then chill for 5 min
- 4 Load the sample. Run the gel at constant 10W for 1.5-2 hrs (until first dye front reaches the bottom)
- 5 Expose the gel for 1 hr
- 6 Excise the band corresponding to the desired size of small RNA (~36-41 nt) into Eppendorf tubes. Include the ligated radio-labeled oligos
- 7 Spin briefly in a centrifuge at max speed.
- 8 Add 400 $\mu$ L of 0.4M NaCl
- 9 Freeze rapidly in dry ice. Incubate (thaw) overnight at room temperature with agitation. Allow overnight incubation to maximize RNA elution
- 10 (Optional) Spin gel slice homogenate through micropore filter (Ultrafree-MC, 0.22 $\mu$ m, Millipore) for 1 min at RT
- 11 Add 20 $\mu$ g glycogen and 2.5 volume of 100% EtOH (RNase-free)
- 12 Incubate at -20°C 3-6 hours

- 13 Spin at 4°C for 30 min
- 14 Wash with 70% EtOH. Remove all EtOH
- 15 Air dry (2 min). Resuspend in 13µL DEPC MQ

#### ***Section IV: 5' Ligation***

- 1 Set up the following reaction:
 

|                                     |             |
|-------------------------------------|-------------|
| Ligated product (in water)          | 13µL        |
| T4 RNA ligase buffer (10X) (Ambion) | 2µL         |
| DMSO                                | 2µL         |
| Solexa linker (50µM)                | 1µL         |
| T4 RNA ligase (Ambion)              | 2µL         |
| <u>Total</u>                        | <u>20µL</u> |
- 2 Incubate at 37°C for 1 hr
- 3 Add 20ul loading dye
- 4 Heat inactivate at 95°C for 5 min
- 5 Proceed to section III

#### ***Section V: Gel purification of ligated RNA product***

- 1 Prepare a 15% polyacrylamide/urea gel (Sequagel, National Diagnostics)
- 2 Load 10ng of <sup>32</sup>P-labeled decade marker (Ambion) as a size marker
- 3 Heat samples at 95°C for 5 min, then chill for 5 min
- 4 Load the sample. Run the gel at constant 10W for 1.5-2 hrs (until first dye front reaches the bottom)
- 5 Expose the gel for 1 hr
- 6 Excise the band corresponding to the desired size of small RNA (~68-73 nt) into Eppendorf tubes. Include the ligated radio-labeled oligos
- 7 Spin briefly in a centrifuge at max speed.
- 8 Add 400µL of 0.4M NaCl
- 9 Freeze rapidly in dry ice. Incubate (thaw) overnight at room temperature with agitation. Allow overnight incubation to maximize RNA elution
- 10 (Optional) Spin gel slice homogenate through micropore filter (Ultrafree-MC, 0.22µm, Millipore) for 1 min at RT
- 11 Add 20µg glycogen and 2.5 volumes of 100% EtOH (RNase-free)
- 12 Incubate at -20°C 3-6 hours
- 13 Spin at 4°C for 30 min

- 14 Wash with 70% EtOH. Remove all EtOH
- 15 Air dry (2 min). Resuspend in 6.3 $\mu$ L DEPC MQ

### ***Section VI: Reverse transcription***

- 1 Set up the following
 

|                                |             |
|--------------------------------|-------------|
| Ligated RNA product (in water) | 6.3 $\mu$ L |
| BanOne primer (5 $\mu$ M)      | 4.2 $\mu$ L |
- 2 Incubate at 72°C for 2 min
- 3 Centrifuge at RT for 1 min
- 4 Cool on ice for 2 min
- 5 Add 8.4 $\mu$ L RT Mix
 

|               |                                                                |
|---------------|----------------------------------------------------------------|
| RT Mix stock: | 30 $\mu$ L 5X first strand buffer, 15 $\mu$ L dNTP (10mM each) |
|               | 3 $\mu$ L 0.1M DTT, 12 $\mu$ L MQ                              |
- 6 Split into two tubes (9 $\mu$ L each)
- 7 Add either 1 $\mu$ L Superscript III RT (Invitrogen) (+RT) or DEPC MQ (-RT)
- 8 Incubate at 50°C for 1 hr. Heat to 70°C for 15 min. Store at -20°C until use

### ***Section VII: PCR amplification of cDNA***

- 1 Set up the following reaction:
 

|                                          |                             |
|------------------------------------------|-----------------------------|
| First strand cDNA (+RT) or control (-RT) | 5 $\mu$ L                   |
| PCR buffer (10X)                         | 10 $\mu$ L                  |
| dNTP mix (10 mM each)                    | 2 $\mu$ L                   |
| Sol_5_SBS3 (100 $\mu$ M)                 | 1 $\mu$ L                   |
| Sol_3_Modban (100 $\mu$ M)               | 1 $\mu$ L                   |
| MQ                                       | 80 $\mu$ L                  |
| Taq Polymerase (Roche, 5U/ $\mu$ L)      | 1 $\mu$ L                   |
| <u>Total</u>                             | <u>100<math>\mu</math>L</u> |
- 2 Place in a thermal cycler
- 3 Run the following PCR program:
 

|                 |   |             |
|-----------------|---|-------------|
| 94°C for 2 min  | } | X 5 cycles  |
| 94°C for 15 sec |   |             |
| 54°C for 30 sec |   |             |
| 72°C for 30 sec |   |             |
|                 |   |             |
| 94°C for 15 sec | } | X 17 cycles |
| 60°C for 30 sec |   |             |
| 72°C for 30 sec |   |             |



72°C for 2 min  
4°C

- 4 Transfer +RT samples to fresh eppendorf tubes.
- 5 Add 200ul 0.5M NaCl
- 6 Add 300μL phenol:chloroform. Mix well.
- 7 Spin at max speed for 5 min
- 8 Transfer aqueous layer to 300μL chloroform. Mix well
- 9 Spin at max speed for 5 min
- 10 Transfer aqueous layer to 900ul (or 2.5-3 volumes) 100% EtOH and (optional) 20μg glycogen.
- 11 Incubate at -20°C 3-6 hrs
- 12 Spin at 4°C for 30 min at max speeds
- 13 Wash with 70% EtOH. Remove all EtOH
- 14 Air dry. Resuspend in 23.7μL water

### ***Section VIII: PmeI digestion of radiolabeled oligos***

- 1 Set up the following reaction:

|                  |             |
|------------------|-------------|
| PCR products     | 23.7μL      |
| 10x NEB buffer 4 | 3μL         |
| Pme I (NEB)      | 3μL         |
| 100x BSA         | 0.3         |
| <u>Total</u>     | <u>30μL</u> |

- 2 Incubate at 37°C for 3 hrs
- 3 Repeat phenol:chloroform extraction/EtOH precipitation
- 4 Proceed to section IX

### ***Section IX: Gel purification of amplified cDNA***

- 1 Prepare a 2% low-melt agarose gel (SeaKem) according to the manufacturer's instructions
- 2 Load 1μL of 1kb DNA ladder, amplified cDNA (+RT) and control (-RT)
- 3 Run gel at constant 100V until bromophenol blue band (~35nt in TAE) is at 2/3 of the gel length
- 4 View the fragment with a long wave UV source
- 5 Excise the DNA band with a clean scalpel or razor blade

- 6 Transfer the gel slice into a pre-weighed eppendorf
- 7 Add 0.4-0.5M NaCl to a final concentration of not less than 0.3M and no more than 400ul total volume. Melt agarose in solution at 70 degrees C for 10 minutes, flicking tube every couple of minutes.
- 8 Add 1 volume of phenol (equilibrated, pH 8), vortex 15-30 sec then spin at max for 5 minutes.
- 9 Transfer aqueous layer to 1 volume phenol:chloroform, vortex and spin.
- 10 Transfer aqueous layer to 1 volume chloroform and repeat as above.
- 11 Transfer aqueous layer to 2.5 volumes of 100% EtOH.
- 12 Incubate at -20°C overnight.
- 13 Spin at 4°C for 15 min at max speed.
- 14 Wash with 70% EtOH. Remove all EtOH
- 15 Air dry. Resuspend in 20µL water
- 16 Nanodrop and dilute sample to 10nM.
